# Supplementary material for: Heart Failure, Female Sex, and Atrial Fibrillation Are the Main Drivers of Human Atrial Cardiomyopathy: Results From the CATCH ME Consortium
Source: PubMed Central journal article supplement — J Am Heart Assoc. 2023 Nov 20;12(22):e031220. doi: 10.1161/JAHA.123.031220 (PMC10727294; doi:10.1161/jaha.123.031220), 2023-11-20
Supplement: JAH3-12-e031220-s001.pdf [file JAH3-12-e031220-s001.pdf]

# **SUPPLEMENTAL MATERIAL**

|                                                | LA         |      |         | RA         |      |         |
|------------------------------------------------|------------|------|---------|------------|------|---------|
|                                                | Total ECM  |      |         | Total ECM  |      |         |
|                                                | effect (%) | SE   | p value | effect (%) | SE   | p value |
| <i>Sex*:M</i>                                  | -3.97      | 1.47 | 0.011   | -4.74      | 2.06 | 0.029   |
| <i>Age* (/5years increase)</i>                 | 0.25       | 0.31 | 0.291   | 0.49       | 0.38 | 0.178   |
| <i>Weight<sup>§</sup> (/5kg increase)</i>      | -0.14      | 0.24 | 0.331   | -0.77      | 0.24 | 0.003   |
| <i>Height<sup>§</sup> (/5cm increase)</i>      | -0.57      | 0.36 | 0.115   | -0.94      | 0.39 | 0.022   |
| <i>CHA<sub>2</sub>DS<sub>2</sub>-VAsc</i>      | -0.17      | 0.49 | 0.374   | 1.04       | 0.52 | 0.054   |
| <i>Hatch</i>                                   | -0.41      | 0.68 | 0.335   | 0.26       | 0.73 | 0.374   |
| <i>Rhythm*: par.AF</i>                         | -1.71      | 1.62 | 0.229   | 0.32       | 2.02 | 0.393   |
| <i>Rhythm*: pers.AF</i>                        | 1.86       | 1.68 | 0.216   | 3.55       | 2.14 | 0.101   |
| <i>Concomitant PVI</i>                         | -1.95      | 1.69 | 0.205   | 2.31       | 3.13 | 0.303   |
| <i>CABG<sup>§</sup></i>                        | -0.59      | 1.69 | 0.375   | 2.28       | 1.66 | 0.155   |
| <i>MV surgery<sup>§</sup></i>                  | 1.43       | 1.57 | 0.263   | 1.31       | 2.18 | 0.333   |
| <i>MV stenosis</i>                             | 0.44       | 4.46 | 0.396   | -0.72      | 4.56 | 0.393   |
| <i>MV insufficiency</i>                        | 2.79       | 1.41 | 0.058   | 0.52       | 1.91 | 0.384   |
| <i>AV surgery<sup>§</sup></i>                  | -1.89      | 1.73 | 0.219   | 0.11       | 1.84 | 0.398   |
| <i>AV stenosis</i>                             | -1.42      | 1.85 | 0.296   | 0.75       | 1.99 | 0.371   |
| <i>AV insufficiency</i>                        | 0.36       | 1.67 | 0.389   | -1.36      | 1.94 | 0.311   |
| <i>TV insufficiency<sup>§</sup></i>            | 0.44       | 1.51 | 0.382   | 1.92       | 1.98 | 0.248   |
| <i>Heart failure*</i>                          | 3.04       | 1.41 | 0.038   | -2.49      | 1.71 | 0.137   |
| <i>EF (/5% increase)</i>                       | -0.12      | 0.19 | 0.325   | 0.45       | 0.24 | 0.071   |
| <i>NYHA</i>                                    | -0.64      | 0.64 | 0.239   | -0.35      | 0.81 | 0.363   |
| <i>HTX</i>                                     | 2.08       | 1.48 | 0.148   | -4.13      | 1.91 | 0.039   |
| <i>coronary artery Disease</i>                 | -0.38      | 1.42 | 0.384   | 2.61       | 1.69 | 0.122   |
| <i>prior myocardial infarction<sup>§</sup></i> | -1.21      | 1.67 | 0.306   | -1.71      | 2.14 | 0.289   |
| <i>periferal artery disease</i>                | 5.58       | 3.91 | 0.143   | 3.34       | 2.67 | 0.182   |
| <i>Diabetes<sup>§</sup></i>                    | 1.93       | 1.78 | 0.221   | 1.51       | 2.26 | 0.318   |
| <i>hypertension<sup>§</sup></i>                | 1.42       | 1.51 | 0.255   | 1.72       | 1.85 | 0.258   |
| <i>COPD</i>                                    | 6.21       | 3.15 | 0.058   | 1.56       | 3.6  | 0.363   |
| <i>hypothyroidism<sup>§</sup></i>              | 1.94       | 1.87 | 0.232   | 1.99       | 3.25 | 0.329   |
| <i>chronic kidney failure<sup>§</sup></i>      | 7.03       | 2.63 | 0.012   | -0.31      | 3.32 | 0.396   |
| <i>prior stroke<sup>§</sup></i>                | -4.29      | 2.16 | 0.056   | 5.55       | 3.64 | 0.125   |
| <i>prior TIA</i>                               | -1.69      | 3.96 | 0.363   | 2.91       | 2.63 | 0.217   |

**Table S1: Univariate associations between clinical parameters and total ECM, stratified by atrial side.** Univariate associations between clinical parameters and total ECM were obtained with univariate regression analysis. LA/RA: Left/Right atrial appendage, par.AF: paroxysmal AF, pers.AF: persistent AF/ permanent AF; PVI: pulmonary vein isolation; CABG: coronary artery bypass graft; MV: mitral valve; AV: aortic valve; TV: tricuspid valve; EF: ejection fraction; NYHA: New York Heart Association; HTX: heart transplant surgery; COPD: chronic obstructive pulmonary disease; TIA: transient ischemic attack. SE: standard error; \* will be explicitly modeled in multivariate models; §: will be included in principal component modeling

|                                                | LA                       |      |         | RA                       |      |         |
|------------------------------------------------|--------------------------|------|---------|--------------------------|------|---------|
|                                                | Endomysial fibrosis      |      |         | Endomysial fibrosis      |      |         |
|                                                | effect ( $\mu\text{m}$ ) | SE   | p value | effect ( $\mu\text{m}$ ) | SE   | p value |
| <i>Sex*:M</i>                                  | -0.82                    | 0.59 | 0.161   | -1.11                    | 0.61 | 0.074   |
| <i>Age* (/5years increase)</i>                 | -0.11                    | 0.13 | 0.266   | 0.01                     | 0.11 | 0.398   |
| <i>Weight<sup>§</sup> (/5kg increase)</i>      | -0.03                    | 0.09 | 0.368   | -0.21                    | 0.07 | 0.006   |
| <i>Height<sup>§</sup> (/5cm increase)</i>      | -0.23                    | 0.14 | 0.096   | -0.32                    | 0.11 | 0.008   |
| <i>CHA<sub>2</sub>DS<sub>2</sub>-VASc</i>      | 0.06                     | 0.19 | 0.377   | 0.15                     | 0.16 | 0.256   |
| <i>Hatch</i>                                   | 0.44                     | 0.25 | 0.084   | -0.01                    | 0.22 | 0.398   |
| <i>Rhythm*: par.AF</i>                         | -0.25                    | 0.64 | 0.368   | 1.31                     | 0.57 | 0.029   |
| <i>Rhythm*: pers.AF</i>                        | 1.48                     | 0.63 | 0.027   | 1.28                     | 0.59 | 0.039   |
| <i>Concomitant PVI</i>                         | -1.02                    | 0.67 | 0.124   | -0.02                    | 0.94 | 0.398   |
| <i>CABG<sup>§</sup></i>                        | -1.04                    | 0.64 | 0.107   | 0.48                     | 0.49 | 0.244   |
| <i>MV surgery<sup>§</sup></i>                  | -0.14                    | 0.62 | 0.388   | -0.52                    | 0.62 | 0.281   |
| <i>MV stenosis</i>                             | 0.69                     | 1.61 | 0.362   | -0.08                    | 1.31 | 0.398   |
| <i>MV insufficiency</i>                        | 0.72                     | 0.56 | 0.176   | 0.41                     | 0.56 | 0.305   |
| <i>AV surgery<sup>§</sup></i>                  | -1.69                    | 0.65 | 0.015   | -0.43                    | 0.52 | 0.281   |
| <i>AV stenosis</i>                             | -1.38                    | 0.69 | 0.056   | -0.96                    | 0.57 | 0.094   |
| <i>AV insufficiency</i>                        | 0.51                     | 0.66 | 0.293   | 0.22                     | 0.56 | 0.369   |
| <i>TV insufficiency<sup>§</sup></i>            | -0.29                    | 0.58 | 0.351   | 1.62                     | 0.55 | 0.006   |
| <i>Heart failure*</i>                          | 2.41                     | 0.51 | <0.001  | 0.16                     | 0.51 | 0.379   |
| <i>EF (/5% increase)</i>                       | -0.21                    | 0.07 | 0.005   | 0.07                     | 0.07 | 0.246   |
| <i>NYHA</i>                                    | -0.22                    | 0.26 | 0.279   | 0.27                     | 0.23 | 0.201   |
| <i>HTX</i>                                     | 2.51                     | 0.53 | <0.001  | 0.21                     | 0.57 | 0.373   |
| <i>coronary artery Disease</i>                 | -0.73                    | 0.55 | 0.167   | 0.04                     | 0.49 | 0.397   |
| <i>prior myocardial infarction<sup>§</sup></i> | -1.69                    | 0.64 | 0.014   | -0.11                    | 0.63 | 0.392   |
| <i>periferal artery disease</i>                | 3.53                     | 1.47 | 0.024   | -0.02                    | 0.79 | 0.398   |
| <i>Diabetes<sup>§</sup></i>                    | 0.75                     | 0.68 | 0.217   | 0.82                     | 0.64 | 0.175   |
| <i>hypertension<sup>§</sup></i>                | 0.21                     | 0.61 | 0.377   | 0.13                     | 0.54 | 0.387   |
| <i>COPD</i>                                    | 1.39                     | 1.19 | 0.211   | -0.08                    | 1.02 | 0.397   |
| <i>hypothyroidism<sup>§</sup></i>              | -0.09                    | 0.72 | 0.394   | 1.71                     | 0.91 | 0.071   |
| <i>chronic kidney failure<sup>§</sup></i>      | 4.26                     | 0.96 | <0.001  | 0.77                     | 0.96 | 0.288   |
| <i>prior stroke<sup>§</sup></i>                | -0.77                    | 0.85 | 0.264   | 0.17                     | 1.06 | 0.393   |
| <i>prior TIA</i>                               | -1.89                    | 1.46 | 0.172   | -0.18                    | 0.77 | 0.388   |

**Table S2: Univariate associations between clinical parameters and endomysial fibrosis, stratified by atrial side.** Univariate associations between clinical parameters and endomysial fibrosis were obtained with univariate regression analysis. LA/RA: Left/Right atrial appendage, par.AF: paroxysmal AF, pers.AF: persistent AF/permanent AF; PVI: pulmonary vein isolation; CABG: coronary artery bypass graft; MV: mitral valve; AV: aortic valve; TV: tricuspid valve; EF: ejection fraction; NYHA: New York Heart Association; HTX: heart transplant surgery; COPD: chronic obstructive pulmonary disease; TIA: transient ischemic attack. SE: standard error; \* will be explicitly modeled in multivariate models; §: will be included in principal component modeling

|                                                | LA                |      |         | RA                |      |         |
|------------------------------------------------|-------------------|------|---------|-------------------|------|---------|
|                                                | fibroblast signal |      |         | fibroblast signal |      |         |
|                                                | effect            | SE   | p value | effect            | SE   | p value |
| <i>Sex*:M</i>                                  | 0.11              | 0.06 | 0.098   | 0.07              | 0.06 | 0.248   |
| <i>Age* (/5years increase)</i>                 | -0.03             | 0.01 | 0.031   | -0.02             | 0.01 | 0.093   |
| <i>Weight<sup>§</sup> (/5kg increase)</i>      | 0.01              | 0.01 | 0.212   | 0.02              | 0.06 | 0.531   |
| <i>Height<sup>§</sup> (/5cm increase)</i>      | 0.03              | 0.05 | 0.652   | 0.01              | 0.04 | 0.675   |
| <i>CHA<sub>2</sub>DS<sub>2</sub>-VASc</i>      | 0.01              | 0.02 | 0.882   | -0.02             | 0.01 | 0.114   |
| <i>Hatch</i>                                   | 0.06              | 0.02 | 0.009   | <0.01             | 0.02 | 0.936   |
| <i>Rhythm*: par.AF</i>                         | -0.05             | 0.07 | 0.431   | 0.06              | 0.05 | 0.278   |
| <i>Rhythm*: pers.AF</i>                        | 0.04              | 0.06 | 0.488   | 0.14              | 0.05 | 0.011   |
| <i>Concomitant PVI</i>                         | -0.09             | 0.06 | 0.119   | -0.01             | 0.08 | 0.958   |
| <i>CABG<sup>§</sup></i>                        | -0.06             | 0.06 | 0.325   | -0.08             | 0.04 | 0.078   |
| <i>MV surgery<sup>§</sup></i>                  | -0.04             | 0.06 | 0.532   | -0.06             | 0.05 | 0.251   |
| <i>MV stenosis</i>                             | -0.11             | 0.17 | 0.522   | -0.11             | 0.12 | 0.375   |
| <i>MV insufficiency</i>                        | 0.09              | 0.05 | 0.111   | 0.09              | 0.05 | 0.078   |
| <i>AV surgery<sup>§</sup></i>                  | -0.14             | 0.06 | 0.031   | -0.01             | 0.05 | 0.861   |
| <i>AV stenosis</i>                             | -0.12             | 0.06 | 0.063   | -0.03             | 0.05 | 0.599   |
| <i>AV insufficiency</i>                        | 0.07              | 0.07 | 0.299   | 0.08              | 0.05 | 0.118   |
| <i>TV insufficiency<sup>§</sup></i>            | 0.01              | 0.06 | 0.861   | 0.09              | 0.05 | 0.087   |
| <i>Heart failure*</i>                          | 0.21              | 0.05 | <0.001  | 0.12              | 0.04 | 0.007   |
| <i>EF (/5% increase)</i>                       | -0.02             | 0.01 | 0.022   | -0.01             | 0.01 | 0.363   |
| <i>NYHA</i>                                    | 0.03              | 0.02 | 0.181   | 0.06              | 0.02 | 0.002   |
| <i>HTX</i>                                     | 0.24              | 0.05 | <0.001  | 0.15              | 0.05 | 0.003   |
| <i>coronary artery Disease</i>                 | -0.04             | 0.05 | 0.466   | -0.11             | 0.04 | 0.032   |
| <i>prior myocardial infarction<sup>§</sup></i> | -0.07             | 0.06 | 0.262   | 0.04              | 0.05 | 0.477   |
| <i>periferal artery disease</i>                | 0.31              | 0.16 | 0.061   | -0.11             | 0.08 | 0.193   |
| <i>Diabetes<sup>§</sup></i>                    | 0.01              | 0.07 | 0.823   | 0.01              | 0.06 | 0.821   |
| <i>hypertension<sup>§</sup></i>                | 0.08              | 0.06 | 0.169   | -0.07             | 0.05 | 0.113   |
| <i>COPD</i>                                    | -0.02             | 0.11 | 0.839   | -0.09             | 0.09 | 0.322   |
| <i>hypothyroidism<sup>§</sup></i>              | -0.09             | 0.07 | 0.198   | 0.18              | 0.07 | 0.014   |
| <i>chronic kidney failure<sup>§</sup></i>      | 0.27              | 0.11 | 0.009   | -0.09             | 0.08 | 0.291   |
| <i>prior stroke<sup>§</sup></i>                | 0.06              | 0.08 | 0.441   | -0.09             | 0.11 | 0.403   |
| <i>prior TIA</i>                               | -0.11             | 0.13 | 0.421   | 0.01              | 0.07 | 0.941   |

**Table S3: Univariate associations between clinical parameters and fibroblast expression, stratified by atrial side.** Univariate associations between clinical parameters and fibroblast expression were obtained with univariate regression analysis. LA/RA: Left/Right atrial appendage, par.AF: paroxysmal AF, pers.AF: persistent AF/ permanent AF; PVI: pulmonary vein isolation; CABG: coronary artery bypass graft; MV: mitral valve; AV: aortic valve; TV: tricuspid valve; EF: ejection fraction; NYHA: New York Heart Association; HTX: heart transplant surgery; COPD: chronic obstructive pulmonary disease; TIA: transient ischemic attack. SE: standard error; \* will be explicitly modeled in multivariate models; §: will be included in principal component modeling

|                                          | LA               |      |         | RA               |      |         |
|------------------------------------------|------------------|------|---------|------------------|------|---------|
|                                          | myocyte diameter |      |         | myocyte diameter |      |         |
|                                          | effect (µm)      | SE   | p value | effect (µm)      | SE   | p value |
| Sex*:M                                   | 1.26             | 0.44 | 0.006   | 0.69             | 0.56 | 0.219   |
| Age* (/5years increase)                  | -0.09            | 0.11 | 0.372   | -0.02            | 0.09 | 0.832   |
| Weight <sup>§</sup> (/5kg increase)      | 0.02             | 0.01 | 0.141   | 0.02             | 0.01 | 0.056   |
| Height <sup>§</sup> (/5cm increase)      | 0.03             | 0.02 | 0.195   | 0.02             | 0.02 | 0.299   |
| CHA <sub>2</sub> DS <sub>2</sub> -VASc   | 0.09             | 0.15 | 0.548   | -0.14            | 0.14 | 0.336   |
| Hatch                                    | 0.21             | 0.19 | 0.308   | 0.18             | 0.19 | 0.349   |
| Rhythm*: par.AF                          | -0.13            | 0.51 | 0.801   | 0.37             | 0.53 | 0.486   |
| Rhythm*: pers.AF                         | -0.44            | 0.51 | 0.395   | 0.07             | 0.58 | 0.905   |
| Concomitant PVI                          | -0.15            | 0.52 | 0.767   | -0.26            | 0.78 | 0.737   |
| CABG <sup>§</sup>                        | -0.08            | 0.51 | 0.873   | -0.81            | 0.43 | 0.061   |
| MV surgery <sup>§</sup>                  | -0.22            | 0.47 | 0.635   | 0.02             | 0.55 | 0.999   |
| MV stenosis                              | -0.46            | 1.15 | 0.689   | -0.11            | 1.06 | 0.924   |
| MV insufficiency                         | -0.02            | 0.45 | 0.968   | 0.33             | 0.46 | 0.483   |
| AV surgery <sup>§</sup>                  | 0.03             | 0.52 | 0.952   | 0.01             | 0.48 | 0.993   |
| AV stenosis                              | 0.18             | 0.53 | 0.743   | -0.26            | 0.49 | 0.598   |
| AV insufficiency                         | 0.85             | 0.49 | 0.091   | 0.58             | 0.48 | 0.231   |
| TV insufficiency <sup>§</sup>            | 0.11             | 0.45 | 0.815   | -0.19            | 0.51 | 0.711   |
| Heart failure*                           | 0.16             | 0.44 | 0.717   | 0.81             | 0.44 | 0.077   |
| EF (/5% increase)                        | -0.07            | 0.06 | 0.199   | -0.07            | 0.06 | 0.263   |
| NYHA                                     | 0.38             | 0.21 | 0.054   | -0.01            | 0.21 | 0.961   |
| HTX                                      | 0.32             | 0.46 | 0.49    | 0.82             | 0.51 | 0.112   |
| coronary artery Disease                  | 0.32             | 0.43 | 0.461   | -0.76            | 0.43 | 0.085   |
| prior myocardial infarction <sup>§</sup> | 0.29             | 0.51 | 0.561   | 0.04             | 0.55 | 0.939   |
| periferal artery disease                 | -0.54            | 1.15 | 0.636   | -0.89            | 0.77 | 0.257   |
| Diabetes <sup>§</sup>                    | 0.21             | 0.56 | 0.712   | -0.54            | 0.61 | 0.373   |
| hypertension <sup>§</sup>                | 0.52             | 0.47 | 0.266   | 0.13             | 0.49 | 0.795   |
| COPD                                     | -1.14            | 0.99 | 0.255   | -0.48            | 0.94 | 0.611   |
| hypothyroidism <sup>§</sup>              | -0.01            | 0.56 | 0.982   | -0.79            | 0.84 | 0.355   |
| chronic kidney failure <sup>§</sup>      | 1.05             | 0.99 | 0.292   | -0.3             | 0.85 | 0.728   |
| prior stroke <sup>§</sup>                | 0.93             | 0.65 | 0.154   | -1.26            | 0.93 | 0.181   |
| prior TIA                                | 0.08             | 1.15 | 0.947   | 0.04             | 0.73 | 0.962   |

**Table S4: Univariate associations between clinical parameters and myocyte diameter, stratified by atrial side.** Univariate associations between clinical parameters and myocyte diameter were obtained with univariate regression analysis. LA/RA: Left/Right atrial appendage, par.AF: paroxysmal AF, pers.AF: persistent AF/permanent AF; PVI: pulmonary vein isolation; CABG: coronary artery bypass graft; MV: mitral valve; AV: aortic valve; TV: tricuspid valve; EF: ejection fraction; NYHA: New York Heart Association; HTX: heart transplant surgery; COPD: chronic obstructive pulmonary disease; TIA: transient ischemic attack. SE: standard error; \* will be explicitly modeled in multivariate models; §: will be included in principal component modeling

|                                          | LA                |      |         | RA                |      |         |
|------------------------------------------|-------------------|------|---------|-------------------|------|---------|
|                                          | capillary density |      |         | capillary density |      |         |
|                                          | effect            | SE   | p value | effect            | SE   | p value |
| Sex*:M                                   | 0.04              | 0.05 | 0.448   | 0.06              | 0.04 | 0.179   |
| Age* (/5years increase)                  | -0.01             | 0.01 | 0.411   | 0.01              | 0.01 | 0.629   |
| Weight <sup>§</sup> (/5kg increase)      | 0.03              | 0.03 | 0.282   | 0.04              | 0.03 | 0.524   |
| Height <sup>§</sup> (/5cm increase)      | 0.02              | 0.04 | 0.839   | 0.02              | 0.04 | 0.899   |
| CHA <sub>2</sub> DS <sub>2</sub> -VASc   | 0.01              | 0.02 | 0.613   | -0.01             | 0.01 | 0.196   |
| Hatch                                    | 0.04              | 0.02 | 0.068   | -0.02             | 0.01 | 0.291   |
| Rhythm*: par.AF                          | -0.06             | 0.06 | 0.289   | -0.01             | 0.04 | 0.764   |
| Rhythm*: pers.AF                         | 0.05              | 0.06 | 0.411   | 0.07              | 0.04 | 0.105   |
| Concomitant PVI                          | -0.11             | 0.05 | 0.041   | -0.08             | 0.06 | 0.161   |
| CABG <sup>§</sup>                        | 0.02              | 0.06 | 0.996   | 0.01              | 0.03 | 0.895   |
| MV surgery <sup>§</sup>                  | -0.07             | 0.05 | 0.177   | -0.11             | 0.04 | 0.021   |
| MV stenosis                              | -0.11             | 0.12 | 0.423   | -0.08             | 0.09 | 0.375   |
| MV insufficiency                         | 0.06              | 0.05 | 0.237   | -0.03             | 0.04 | 0.413   |
| AV surgery <sup>§</sup>                  | -0.11             | 0.05 | 0.055   | -0.01             | 0.04 | 0.812   |
| AV stenosis                              | -0.11             | 0.06 | 0.082   | -0.04             | 0.04 | 0.238   |
| AV insufficiency                         | 0.02              | 0.06 | 0.729   | 0.04              | 0.04 | 0.247   |
| TV insufficiency <sup>§</sup>            | 0.01              | 0.05 | 0.975   | -0.01             | 0.04 | 0.749   |
| Heart failure*                           | 0.12              | 0.05 | 0.011   | 0.04              | 0.03 | 0.279   |
| EF (/5% increase)                        | -0.02             | 0.01 | 0.009   | 0.01              | 0.01 | 0.948   |
| NYHA                                     | 0.05              | 0.02 | 0.031   | -0.02             | 0.02 | 0.319   |
| HTX                                      | 0.17              | 0.05 | 0.011   | 0.04              | 0.04 | 0.341   |
| coronary artery Disease                  | -0.01             | 0.05 | 0.819   | -0.05             | 0.04 | 0.187   |
| prior myocardial infarction <sup>§</sup> | 0.02              | 0.06 | 0.975   | -0.03             | 0.04 | 0.488   |
| periferal artery disease                 | 0.05              | 0.12 | 0.651   | 0.02              | 0.05 | 0.957   |
| Diabetes <sup>§</sup>                    | 0.09              | 0.06 | 0.117   | 0.02              | 0.05 | 0.621   |
| hypertension <sup>§</sup>                | 0.04              | 0.05 | 0.403   | -0.02             | 0.03 | 0.603   |
| COPD                                     | 0.07              | 0.11 | 0.526   | -0.05             | 0.07 | 0.504   |
| hypothyroidism <sup>§</sup>              | -0.09             | 0.06 | 0.181   | 0.17              | 0.06 | 0.007   |
| chronic kidney failure <sup>§</sup>      | 0.17              | 0.09 | 0.061   | -0.04             | 0.06 | 0.498   |
| prior stroke <sup>§</sup>                | 0.02              | 0.07 | 0.738   | -0.06             | 0.07 | 0.447   |
| prior TIA                                | -0.06             | 0.12 | 0.624   | -0.03             | 0.05 | 0.621   |

**Table S5: Univariate associations between clinical parameters and capillary density, stratified by atrial side.** Univariate associations between clinical parameters and capillary density were obtained with univariate regression analysis. LA/RA: Left/Right atrial appendage, par.AF: paroxysmal AF, pers.AF: persistent AF/permanent AF; PVI: pulmonary vein isolation; CABG: coronary artery bypass graft; MV: mitral valve; AV: aortic valve; TV: tricuspid valve; EF: ejection fraction; NYHA: New York Heart Association; HTX: heart transplant surgery; COPD: chronic obstructive pulmonary disease; TIA: transient ischemic attack. SE: standard error; \* will be explicitly modeled in multivariate models; §: will be included in principal component modeling

|                                                | LA             |      |         | RA             |      |         |
|------------------------------------------------|----------------|------|---------|----------------|------|---------|
|                                                | capillary size |      |         | capillary size |      |         |
|                                                | effect (µm)    | SE   | p value | effect (µm)    | SE   | p value |
| <i>Sex*:M</i>                                  | 0.11           | 0.21 | 0.591   | 0.02           | 0.16 | 0.998   |
| <i>Age* (/5years increase)</i>                 | -0.09          | 0.04 | 0.035   | 0.02           | 0.03 | 0.583   |
| <i>Weight<sup>§</sup> (/5kg increase)</i>      | 0.02           | 0.02 | 0.952   | 0.01           | 0.01 | 0.441   |
| <i>Height<sup>§</sup> (/5cm increase)</i>      | -0.02          | 0.01 | 0.254   | 0.01           | 0.01 | 0.734   |
| <i>CHA<sub>2</sub>DS<sub>2</sub>-VASc</i>      | -0.08          | 0.06 | 0.232   | -0.04          | 0.04 | 0.355   |
| <i>Hatch</i>                                   | -0.04          | 0.09 | 0.678   | 0.02           | 0.06 | 0.992   |
| <i>Rhythm*: par.AF</i>                         | -0.51          | 0.22 | 0.026   | 0.02           | 0.16 | 0.912   |
| <i>Rhythm*: pers.AF</i>                        | -0.24          | 0.21 | 0.263   | 0.09           | 0.16 | 0.584   |
| <i>Concomitant PVI</i>                         | -0.34          | 0.21 | 0.121   | 0.11           | 0.22 | 0.651   |
| <i>CABG<sup>§</sup></i>                        | -0.18          | 0.22 | 0.413   | -0.19          | 0.12 | 0.124   |
| <i>MV surgery<sup>§</sup></i>                  | -0.25          | 0.21 | 0.226   | 0.21           | 0.16 | 0.201   |
| <i>MV stenosis</i>                             | 1.31           | 0.45 | 0.005   | -0.16          | 0.38 | 0.668   |
| <i>MV insufficiency</i>                        | 0.21           | 0.19 | 0.293   | 0.31           | 0.14 | 0.028   |
| <i>AV surgery<sup>§</sup></i>                  | -0.16          | 0.22 | 0.481   | -0.09          | 0.14 | 0.508   |
| <i>AV stenosis</i>                             | 0.01           | 0.23 | 0.974   | -0.02          | 0.16 | 0.918   |
| <i>AV insufficiency</i>                        | -0.38          | 0.22 | 0.087   | 0.11           | 0.15 | 0.478   |
| <i>TV insufficiency<sup>§</sup></i>            | -0.11          | 0.19 | 0.586   | 0.24           | 0.14 | 0.102   |
| <i>Heart failure*</i>                          | 0.51           | 0.18 | 0.005   | 0.29           | 0.13 | 0.024   |
| <i>EF (/5% increase)</i>                       | -0.07          | 0.02 | 0.002   | -0.03          | 0.01 | 0.096   |
| <i>NYHA</i>                                    | 0.12           | 0.09 | 0.188   | 0.14           | 0.29 | 0.021   |
| <i>HTX</i>                                     | 0.44           | 0.19 | 0.022   | 0.34           | 0.15 | 0.023   |
| <i>coronary artery Disease</i>                 | 0.17           | 0.18 | 0.358   | -0.09          | 0.13 | 0.507   |
| <i>prior myocardial infarction<sup>§</sup></i> | 0.24           | 0.21 | 0.254   | 0.25           | 0.16 | 0.113   |
| <i>periferal artery disease</i>                | -0.24          | 0.48 | 0.621   | -0.19          | 0.21 | 0.367   |
| <i>Diabetes<sup>§</sup></i>                    | 0.38           | 0.23 | 0.096   | -0.29          | 0.18 | 0.111   |
| <i>hypertension<sup>§</sup></i>                | 0.07           | 0.21 | 0.739   | -0.15          | 0.14 | 0.265   |
| <i>COPD</i>                                    | 0.77           | 0.36 | 0.037   | -0.35          | 0.29 | 0.245   |
| <i>hypothyroidism<sup>§</sup></i>              | 0.51           | 0.25 | 0.042   | 0.11           | 0.22 | 0.635   |
| <i>chronic kidney failure<sup>§</sup></i>      | 1.01           | 0.36 | 0.006   | 0.01           | 0.23 | 0.969   |
| <i>prior stroke<sup>§</sup></i>                | -0.29          | 0.27 | 0.296   | -0.02          | 0.31 | 0.959   |
| <i>prior TIA</i>                               | 0.37           | 0.47 | 0.441   | -0.21          | 0.21 | 0.333   |

**Table S6: Univariate associations between clinical parameters and capillary diameter, stratified by atrial side.** Univariate associations between clinical parameters and capillary diameter were obtained with univariate regression analysis. LA/RA: Left/Right atrial appendage, par.AF: paroxysmal AF, pers.AF: persistent AF/permanent AF; PVI: pulmonary vein isolation; CABG: coronary artery bypass graft; MV: mitral valve; AV: aortic valve; TV: tricuspid valve; EF: ejection fraction; NYHA: New York Heart Association; HTX: heart transplant surgery; COPD: chronic obstructive pulmonary disease; TIA: transient ischemic attack. SE: standard error; \* will be explicitly modeled in multivariate models; §: will be included in principal component modeling

**LA**

|                      | total ECM   |      |       |        | endomysial fibrosis |      |        |        | fibroblast signal |       |       |       | myocyte diameter   |      |       |        |
|----------------------|-------------|------|-------|--------|---------------------|------|--------|--------|-------------------|-------|-------|-------|--------------------|------|-------|--------|
|                      | $\beta$ (%) | SE   | p     | padj   | $\beta$ ( $\mu$ m)  | SE   | p      | padj   | $\beta$ (%)       | SE    | p     | padj  | $\beta$ ( $\mu$ m) | SE   | p     | padj   |
| <i>intercept</i>     | 26.97       | 3.63 |       |        | 4.77                | 1.25 |        |        | 2.78              | 3.45  |       |       | 14.31              | 1.36 |       |        |
| <i>age</i>           | 0.43        | 0.26 | 0.125 | 0.107  | 0.06                | 0.06 | 0.534  | 0.745  | 0.32              | 0.26  | 0.225 | 0.313 | -0.11              | 0.13 | 0.384 | 0.426  |
| <i>sex:F</i>         | 4.56        | 1.47 | 0.003 | <0.001 | 0.99                | 0.51 | 0.048  | 0.002  | 1.26              | -1.07 | 0.247 | 0.234 | -1.87              | 0.72 | 0.012 | <0.001 |
| <i>heart failure</i> | 2.93        | 1.15 | 0.014 | 0.013  | 1.79                | 0.41 | <0.001 | <0.001 | 3.12              | 1.12  | 0.006 | 0.011 | 0.45               | 0.57 | 0.431 | 0.151  |
| <i>parAF</i>         | -1.05       | 1.27 | 0.412 | 0.804  | 0.37                | 0.44 | 0.414  | 0.056  | -0.01             | 1.22  | 0.992 | 0.981 | 0.33               | 0.62 | 0.645 | 0.556  |
| <i>persAF</i>        | 1.07        | 1.23 | 0.387 | 0.203  | 1.07                | 0.41 | 0.014  | 0.042  | 0.86              | 1.14  | 0.454 | 0.331 | 0.01               | 0.58 | 0.994 | 0.941  |
| <i>PC1</i>           | 0.66        | 0.39 | 0.095 | 0.162  | 0.15                | 0.13 | 0.282  | 0.326  | 0.21              | 0.35  | 0.916 | 0.886 | -0.07              | 0.19 | 0.723 | 0.725  |
| <i>PC2</i>           | 0.29        | 0.41 | 0.486 | 0.448  | 0.11                | 0.29 | 0.408  | 0.478  | 0.14              | 0.18  | 0.328 | 0.285 | -0.03              | 0.2  | 0.871 | 0.841  |
| <i>PC3</i>           | -0.13       | 0.45 | 0.781 | 0.724  | -0.27               | 0.15 | 0.077  | 0.114  | -0.06             | 0.08  | 0.349 | 0.387 | -0.3               | 0.21 | 0.158 | 0.268  |
| <i>PC4</i>           | 0.74        | 0.43 | 0.094 | 0.103  | 0.23                | 0.15 | 0.139  | 0.196  | 0.24              | 0.22  | 0.783 | 0.774 | -0.08              | 0.21 | 0.719 | 0.728  |

**RA**

|                      | total ECM   |      |       |       | endomysial fibrosis |      |       |       | fibroblast signal |       |       |       | myocyte diameter   |      |       |       |
|----------------------|-------------|------|-------|-------|---------------------|------|-------|-------|-------------------|-------|-------|-------|--------------------|------|-------|-------|
|                      | $\beta$ (%) | SE   | p     | padj  | $\beta$ ( $\mu$ m)  | SE   | p     | padj  | $\beta$ (%)       | SE    | p     | padj  | $\beta$ ( $\mu$ m) | SE   | p     | padj  |
| <i>intercept</i>     | 33.86       | 4.51 |       |       | 8.29                | 1.3  |       |       | 5.88              | 2.87  |       |       | 11.84              | 1.57 |       |       |
| <i>age</i>           | 0.03        | 0.06 | 0.661 | 0.161 | -0.01               | 0.02 | 0.368 | 0.638 | 0.24              | 4.02  | 0.323 | 0.237 | 0.01               | 0.02 | 0.569 | 0.638 |
| <i>sex:F</i>         | 2.22        | 1.89 | 0.252 | 0.094 | 0.35                | 0.54 | 0.524 | 0.473 | -0.61             | -1.52 | 0.191 | 0.998 | -0.69              | 0.7  | 0.328 | 0.191 |
| <i>heart failure</i> | -0.7        | 1.49 | 0.639 | 0.571 | -0.16               | 0.43 | 0.712 | 0.824 | -0.93             | 1.32  | 0.181 | 0.466 | 0.93               | 0.55 | 0.107 | 0.104 |
| <i>parAF</i>         | -0.42       | 1.62 | 0.795 | 0.462 | 0.86                | 0.48 | 0.083 | 0.172 | 2.85              | 1.48  | 0.132 | 0.829 | 1.13               | 0.6  | 0.061 | 0.186 |
| <i>persAF</i>        | 2.14        | 1.65 | 0.215 | 0.227 | 0.89                | 0.43 | 0.032 | 0.044 | 4.21              | 1.55  | 0.021 | 0.007 | 0.15               | 0.6  | 0.814 | 0.442 |
| <i>PC1</i>           | -0.06       | 0.45 | 0.896 | 0.779 | -0.12               | 0.13 | 0.378 | 0.436 | -0.27             | 0.18  | 0.224 | 0.255 | -0.01              | 0.16 | 0.927 | 0.905 |
| <i>PC2</i>           | 0.89        | 0.46 | 0.068 | 0.186 | 0.19                | 0.13 | 0.164 | 0.255 | -0.17             | 0.13  | 0.344 | 0.412 | -0.35              | 0.19 | 0.072 | 0.138 |
| <i>PC3</i>           | -0.67       | 0.53 | 0.214 | 0.178 | -0.12               | 0.15 | 0.444 | 0.478 | -0.08             | 0.11  | 0.962 | 0.846 | 0.08               | 0.19 | 0.704 | 0.746 |
| <i>PC4</i>           | -0.5        | 0.55 | 0.363 | 0.423 | -0.04               | 0.15 | 0.781 | 0.913 | -0.15             | 0.06  | 0.693 | 0.712 | 0.08               | 0.2  | 0.674 | 0.631 |

**Table S7: Multivariate models describing the association between clinical traits and structural properties of the myocardium in left (LA) and right (RA) atrial appendages.** Age, sex, heart failure and rhythm history were modeled explicitly. A combination of 13 additional clinical traits was combined in 4 principal components (PCs). B: Degree of change in the outcome variable for every unit of change in the predictor variable. SE: standard error, ECM: extracellular matrix, parAF: paroxysmal atrial fibrillation, persAF: persistent atrial fibrillation, PC: principal component



LA

|                      | capillary density |      |       |                  | capillary size     |      |       |                  |
|----------------------|-------------------|------|-------|------------------|--------------------|------|-------|------------------|
|                      | $\beta$ (n)       | SE   | p     | p <sub>adj</sub> | $\beta$ ( $\mu$ m) | SE   | p     | p <sub>adj</sub> |
| <i>intercept</i>     | 0.49              | 0.19 |       |                  | 5.62               | 0.76 |       |                  |
| <i>age</i>           | 1.50E-04          | 0.01 | 0.991 | 0.863            | -0.02              | 0.05 | 0.736 | 0.505            |
| <i>sex:F</i>         | -0.05             | 0.08 | 0.523 | 0.843            | -0.03              | 0.29 | 0.932 | 0.581            |
| <i>heart failure</i> | 0.14              | 0.06 | 0.032 | 0.007            | 0.48               | 0.23 | 0.041 | 0.016            |
| <i>parAF</i>         | -0.03             | 0.07 | 0.694 | 0.403            | -0.28              | 0.25 | 0.257 | 0.064            |
| <i>persAF</i>        | 0.06              | 0.06 | 0.308 | 0.059            | -0.21              | 0.23 | 0.369 | 0.377            |
| <i>PC1</i>           | 0.03              | 0.02 | 0.124 | 0.183            | 0.03               | 0.08 | 0.712 | 0.618            |
| <i>PC2</i>           | -0.01             | 0.02 | 0.776 | 0.795            | 0.04               | 0.08 | 0.594 | 0.716            |
| <i>PC3</i>           | -0.02             | 0.02 | 0.361 | 0.335            | -0.11              | 0.08 | 0.163 | 0.264            |
| <i>PC4</i>           | 0.01              | 0.02 | 0.693 | 0.675            | 0.07               | 0.08 | 0.393 | 0.366            |

RA

|                      | capillary density |      |       |                  | capillary size     |      |       |                  |
|----------------------|-------------------|------|-------|------------------|--------------------|------|-------|------------------|
|                      | $\beta$ (n)       | SE   | p     | p <sub>adj</sub> | $\beta$ ( $\mu$ m) | SE   | p     | p <sub>adj</sub> |
| <i>intercept</i>     | 0.28              | 0.13 |       |                  | 4.89               | 0.46 |       |                  |
| <i>age</i>           | 0.01              | 0.01 | 0.591 | 0.379            | 0.05               | 0.03 | 0.171 | 0.686            |
| <i>sex:F</i>         | -0.08             | 0.05 | 0.012 | 0.156            | -0.02              | 0.19 | 0.911 | 0.997            |
| <i>heart failure</i> | 0.03              | 0.04 | 0.516 | 0.064            | 0.31               | 0.16 | 0.047 | 0.084            |
| <i>parAF</i>         | -0.01             | 0.04 | 0.794 | 0.765            | -0.08              | 0.17 | 0.661 | 0.548            |
| <i>persAF</i>        | 0.09              | 0.04 | 0.061 | 0.058            | 0.01               | 0.16 | 0.942 | 0.922            |
| <i>PC1</i>           | 0.02              | 0.01 | 0.974 | 0.913            | -0.03              | 0.05 | 0.518 | 0.476            |
| <i>PC2</i>           | -0.01             | 0.01 | 0.398 | 0.415            | 0.01               | 0.05 | 0.837 | 0.835            |
| <i>PC3</i>           | 0.01              | 0.01 | 0.878 | 0.836            | 0.06               | 0.05 | 0.291 | 0.225            |
| <i>PC4</i>           | 0.01              | 0.01 | 0.632 | 0.689            | -0.004             | 0.06 | 0.939 | 0.899            |

**Table S8 (continuation S7): Multivariate models describing the association between clinical traits and structural properties of the myocardium in left (LA) and right (RA) atrial appendages.** Age, sex, heart failure and rhythm history were modeled explicitly. A combination of 13 additional clinical traits was combined in 4 principal components (PCs). B: Degree of change in the outcome variable for every unit of change in the predictor variable. SE: standard error, ECM: extracellular matrix, parAF: paroxysmal atrial fibrillation, persAF: persistent atrial fibrillation, PC: principal component

|                                          | LA           |      |          | RA           |      |          |
|------------------------------------------|--------------|------|----------|--------------|------|----------|
|                                          | Total ECM    |      |          | Total ECM    |      |          |
|                                          | Estimate (%) | SE   | p value  | Estimate (%) | SE   | p value  |
| Sex*:M                                   | -4.70        | 1.37 | 1.56E-03 | -1.12        | 0.67 | 9.92E-02 |
| Age* (/5years increase)                  | 0.53         | 0.37 | 1.44E-01 | 0.27         | 0.15 | 8.62E-02 |
| Weight <sup>§</sup> (/5kg increase)      | -0.69        | 0.23 | 5.36E-03 | -0.18        | 0.08 | 3.65E-02 |
| Height <sup>§</sup> (/5cm increase)      | -0.76        | 0.35 | 3.77E-02 | -0.28        | 0.13 | 4.72E-02 |
| CHA <sub>2</sub> DS <sub>2</sub> -VASc   | 0.02         | 0.50 | 3.97E-01 | 0.40         | 0.18 | 4.01E-02 |
| Hatch                                    | -0.60        | 0.68 | 2.70E-01 | 0.28         | 0.25 | 2.10E-01 |
| Rhythm*: par.AF                          | -1.28        | 1.65 | 2.94E-01 | 1.70         | 0.63 | 1.11E-02 |
| Rhythm*: pers.AF                         | 1.39         | 1.90 | 3.04E-01 | 1.60         | 0.69 | 2.86E-02 |
| Concomitant PVI                          | -1.19        | 1.54 | 2.95E-01 | 0.03         | 0.96 | 3.97E-01 |
| CABG <sup>§</sup>                        | 0.34         | 1.54 | 3.88E-01 | 0.70         | 0.55 | 1.76E-01 |
| MV surgery <sup>§</sup>                  | 2.95         | 1.43 | 4.92E-02 | -0.47        | 0.65 | 3.06E-01 |
| MV stenosis                              | 3.06         | 4.40 | 3.11E-01 | -0.55        | 1.63 | 3.75E-01 |
| MV insufficiency                         | 2.22         | 1.48 | 1.30E-01 | 0.14         | 0.66 | 3.89E-01 |
| AV surgery <sup>§</sup>                  | -1.15        | 1.57 | 3.03E-01 | -0.42        | 0.57 | 3.02E-01 |
| AV stenosis                              | -0.47        | 1.68 | 3.82E-01 | 0.33         | 0.64 | 3.48E-01 |
| AV insufficiency                         | 0.02         | 1.49 | 3.98E-01 | 1.22         | 0.64 | 6.45E-02 |
| TV insufficiency <sup>§</sup>            | 0.25         | 1.99 | 3.95E-01 | 0.32         | 0.88 | 3.71E-01 |
| Heart failure*                           | 1.50         | 5.38 | 3.82E-01 | -0.38        | 1.18 | 3.78E-01 |
| EF (/5% increase)                        | 0.07         | 0.33 | 3.89E-01 | 0.02         | 0.01 | 3.93E-01 |
| NYHA                                     | 9.49         | 4.89 | 6.17E-02 | 1.35         | 1.08 | 1.82E-01 |
| coronary artery Disease                  | -0.92        | 0.72 | 1.77E-01 | 0.31         | 0.28 | 2.17E-01 |
| prior myocardial infarction <sup>§</sup> | 0.47         | 1.95 | 3.86E-01 | 0.78         | 0.75 | 2.31E-01 |
| periferal artery disease                 | -0.07        | 1.79 | 3.97E-01 | 0.67         | 0.74 | 2.61E-01 |
| Diabetes <sup>§</sup>                    | -3.73        | 1.85 | 5.38E-02 | 0.24         | 1.08 | 3.88E-01 |
| hypertension <sup>§</sup>                | -0.99        | 3.35 | 3.80E-01 | -0.11        | 0.79 | 3.93E-01 |
| COPD                                     | 0.01         | 0.07 | 3.89E-01 | 0.00         | 0.03 | 3.93E-01 |
| hypothyroidism <sup>§</sup>              | 0.07         | 0.14 | 3.58E-01 | 0.00         | 0.05 | 3.97E-01 |
| chronic kidney failure <sup>§</sup>      | 9.49         | 4.89 | 6.18E-02 | 1.35         | 1.08 | 1.81E-01 |
| prior stroke <sup>§</sup>                | -3.73        | 1.85 | 5.41E-02 | 0.24         | 1.08 | 3.88E-01 |
| prior TIA                                | -0.99        | 3.45 | 3.81E-01 | -0.11        | 0.79 | 3.93E-01 |

**Table S9: Univariate associations between clinical parameters and total ECM, stratified by atrial side, excluding HTX patients.** Univariate associations between clinical parameters and total ECM were obtained with univariate regression analysis. LA/RA: Left/Right atrial appendage, par.AF: paroxysmal AF, pers.AF: persistent AF/permanent AF; PVI: pulmonary vein isolation; CABG: coronary artery bypass graft; MV: mitral valve; AV: aortic valve; TV: tricuspid valve; EF: ejection fraction; NYHA: New York Heart Association; HTX: heart transplant surgery; COPD: chronic obstructive pulmonary disease; TIA: transient ischemic attack. SE: standard error; \* will be explicitly modeled in multivariate models; §: will be included in principal component modeling

|                                          | LA                  |      |          | RA                  |      |          |
|------------------------------------------|---------------------|------|----------|---------------------|------|----------|
|                                          | Endomysial fibrosis |      |          | Endomysial fibrosis |      |          |
|                                          | Estimate (µm)       | SE   | p value  | Estimate (µm)       | SE   | p value  |
| Sex*:M                                   | -4.48               | 2.29 | 5.98E-02 | -0.96               | 2.88 | 2.05E-03 |
| Age* (/5years increase)                  | 0.60                | 0.53 | 2.13E-01 | 1.45                | 0.82 | 8.45E-02 |
| Weight <sup>§</sup> (/5kg increase)      | -0.76               | 0.28 | 1.07E-02 | -1.53               | 0.47 | 2.45E-03 |
| Height <sup>§</sup> (/5cm increase)      | -0.85               | 0.47 | 7.83E-02 | -1.87               | 0.69 | 1.12E-02 |
| CHA <sub>2</sub> DS <sub>2</sub> -VASc   | 1.23                | 0.64 | 6.18E-02 | 0.32                | 0.10 | 2.48E-03 |
| Hatch                                    | 1.10                | 0.85 | 1.71E-01 | 0.33                | 0.14 | 2.84E-02 |
| Rhythm*: par.AF                          | 0.89                | 2.25 | 3.67E-01 | 0.45                | 0.34 | 1.65E-01 |
| Rhythm*: pers.AF                         | 5.72                | 2.51 | 3.15E-02 | 1.02                | 0.38 | 1.14E-02 |
| Concomitant PVI                          | 1.29                | 3.19 | 3.66E-01 | 1.00                | 3.30 | 3.80E-01 |
| CABG <sup>§</sup>                        | 0.81                | 1.90 | 3.62E-01 | -1.55               | 3.30 | 3.55E-01 |
| MV surgery <sup>§</sup>                  | 0.20                | 2.26 | 3.96E-01 | 0.82                | 0.30 | 1.13E-02 |
| MV stenosis                              | 0.78                | 5.59 | 3.94E-01 | 1.70                | 0.91 | 7.16E-02 |
| MV insufficiency                         | -0.52               | 2.21 | 3.87E-01 | 0.63                | 0.31 | 5.28E-02 |
| AV surgery <sup>§</sup>                  | -1.38               | 1.95 | 3.09E-01 | -0.53               | 0.32 | 1.03E-01 |
| AV stenosis                              | -3.00               | 2.19 | 1.55E-01 | 0.31                | 0.35 | 2.72E-01 |
| AV insufficiency                         | 0.06                | 2.22 | 3.97E-01 | -0.06               | 0.32 | 3.98E-01 |
| TV insufficiency <sup>§</sup>            | -0.34               | 2.92 | 3.95E-01 | -0.98               | 0.38 | 1.55E-02 |
| Heart failure*                           | 2.85                | 4.08 | 3.11E-01 | -1.33               | 1.07 | 1.83E-01 |
| EF (/5% increase)                        | -0.34               | 0.54 | 3.25E-01 | 0.10                | 0.75 | 3.94E-01 |
| NYHA                                     | -1.32               | 3.73 | 3.73E-01 | 0.31                | 0.17 | 3.36E-03 |
| coronary artery Disease                  | 0.15                | 0.98 | 3.93E-01 | -0.25               | 0.15 | 1.08E-01 |
| prior myocardial infarction <sup>§</sup> | 1.12                | 2.62 | 3.62E-01 | 0.60                | 0.41 | 1.33E-01 |
| periferal artery disease                 | -0.76               | 2.57 | 3.80E-01 | 0.57                | 0.39 | 1.40E-01 |
| Diabetes <sup>§</sup>                    | 4.90                | 3.77 | 1.71E-01 | 0.23                | 0.40 | 3.36E-01 |
| hypertension <sup>§</sup>                | 2.08                | 2.76 | 2.99E-01 | -0.62               | 0.63 | 2.57E-01 |
| COPD                                     | -0.07               | 0.11 | 3.25E-01 | 0.02                | 0.15 | 3.94E-01 |
| hypothyroidism <sup>§</sup>              | -0.23               | 0.19 | 1.88E-01 | 0.59                | 0.26 | 2.91E-02 |
| chronic kidney failure <sup>§</sup>      | -1.32               | 3.73 | 3.74E-01 | 0.39                | 0.12 | 3.32E-03 |
| prior stroke <sup>§</sup>                | 4.90                | 3.77 | 1.71E-01 | 0.23                | 0.40 | 3.35E-01 |
| prior TIA                                | 2.08                | 2.76 | 2.99E-01 | -0.62               | 0.66 | 3.68E-01 |

**Table S10: Univariate associations between clinical parameters and endomysial fibrosis, stratified by atrial side, excluding HTX patients.** Univariate associations between clinical parameters and endomysial fibrosis were obtained with univariate regression analysis. LA/RA: Left/Right atrial appendage, par.AF: paroxysmal AF, pers.AF: persistent AF/ permanent AF; PVI: pulmonary vein isolation; CABG: coronary artery bypass graft; MV: mitral valve; AV: aortic valve; TV: tricuspid valve; EF: ejection fraction; NYHA: New York Heart Association; HTX: heart transplant surgery; COPD: chronic obstructive pulmonary disease; TIA: transient ischemic attack. SE: standard error; \* will be explicitly modeled in multivariate models; §: will be included in principal component modeling

|                                          | LA                 |      |          | RA                 |      |          |
|------------------------------------------|--------------------|------|----------|--------------------|------|----------|
|                                          | fibroblast density |      |          | fibroblast density |      |          |
|                                          | Estimate           | SE   | p value  | Estimate           | SE   | p value  |
| Sex*:M                                   | 0.03               | 0.05 | 5.61E-01 | 0.03               | 0.05 | 5.63E-01 |
| Age* (/5years increase)                  | 0.01               | 0.01 | 4.84E-01 | 0.02               | 0.01 | 7.37E-02 |
| Weight <sup>§</sup> (/5kg increase)      | 0.02               | 0.02 | 1.71E-01 | <0.01              | 0.01 | 9.51E-01 |
| Height <sup>§</sup> (/5cm increase)      | 0.02               | 0.02 | 3.12E-01 | -0.01              | 0.00 | 7.65E-01 |
| CHA <sub>2</sub> DS <sub>2</sub> -VASc   | 0.04               | 0.01 | 2.15E-02 | 0.01               | 0.02 | 5.72E-01 |
| Hatch                                    | 0.05               | 0.02 | 6.53E-03 | 0.02               | 0.02 | 3.17E-01 |
| Rhythm*: par.AF                          | 0.06               | 0.05 | 2.59E-01 | 0.07               | 0.05 | 2.18E-01 |
| Rhythm*: pers.AF                         | 0.09               | 0.06 | 1.32E-01 | 0.04               | 0.05 | 4.74E-01 |
| Concomitant PVI                          | -0.01              | 0.05 | 8.72E-01 | 0.04               | 0.07 | 5.43E-01 |
| CABG <sup>§</sup>                        | 0.03               | 0.05 | 4.93E-01 | -0.02              | 0.04 | 6.51E-01 |
| MV surgery <sup>§</sup>                  | 0.06               | 0.05 | 1.89E-01 | -0.02              | 0.05 | 6.48E-01 |
| MV stenosis                              | -0.12              | 0.17 | 4.63E-01 | -0.07              | 0.11 | 5.31E-01 |
| MV insufficiency                         | 0.11               | 0.04 | 2.04E-02 | 0.07               | 0.05 | 1.55E-01 |
| AV surgery <sup>§</sup>                  | -0.05              | 0.05 | 2.71E-01 | 0.04               | 0.04 | 3.27E-01 |
| AV stenosis                              | -0.04              | 0.05 | 4.65E-01 | 0.03               | 0.05 | 6.28E-01 |
| AV insufficiency                         | 0.13               | 0.05 | 1.11E-02 | 0.09               | 0.05 | 8.21E-02 |
| TV insufficiency <sup>§</sup>            | 0.08               | 0.05 | 8.88E-02 | 0.03               | 0.05 | 5.16E-01 |
| Heart failure*                           | 0.05               | 0.07 | 4.34E-01 | 0.04               | 0.06 | 5.09E-01 |
| EF (/5% increase)                        | 0.00               | 0.01 | 6.70E-01 | 0.01               | 0.01 | 6.39E-01 |
| NYHA                                     | 0.02               | 0.02 | 4.56E-01 | 0.05               | 0.02 | 2.00E-02 |
| coronary artery Disease                  | -0.03              | 0.05 | 5.07E-01 | -0.06              | 0.04 | 2.12E-01 |
| prior myocardial infarction <sup>§</sup> | -0.06              | 0.06 | 3.07E-01 | 0.04               | 0.06 | 4.91E-01 |
| periferal artery disease                 | 0.55               | 0.15 | 4.35E-04 | -0.08              | 0.08 | 3.31E-01 |
| Diabetes <sup>§</sup>                    | 0.01               | 0.06 | 9.30E-01 | 0.00               | 0.06 | 9.68E-01 |
| hypertension <sup>§</sup>                | 0.11               | 0.05 | 3.89E-02 | 0.02               | 0.05 | 7.12E-01 |
| COPD                                     | -0.25              | 0.16 | 1.28E-01 | -0.06              | 0.08 | 4.77E-01 |
| hypothyroidism <sup>§</sup>              | -0.07              | 0.06 | 3.02E-01 | 0.00               | 0.08 | 9.94E-01 |
| chronic kidney failure <sup>§</sup>      | -0.12              | 0.17 | 4.59E-01 | -0.05              | 0.08 | 5.20E-01 |
| prior stroke <sup>§</sup>                | 0.15               | 0.06 | 1.13E-02 | -0.06              | 0.10 | 5.37E-01 |
| prior TIA                                | -0.04              | 0.10 | 6.90E-01 | 0.04               | 0.06 | 4.80E-01 |

**Table S11: Univariate associations between clinical parameters and fibroblast expression, stratified by atrial side, excluding HTX patients.** Univariate associations between clinical parameters and fibroblast expression were obtained with univariate regression analysis. LA/RA: Left/Right atrial appendage, par.AF: paroxysmal AF, pers.AF: persistent AF/permanent AF; PVI: pulmonary vein isolation; CABG: coronary artery bypass graft; MV: mitral valve; AV: aortic valve; TV: tricuspid valve; EF: ejection fraction; NYHA: New York Heart Association; HTX: heart transplant surgery; COPD: chronic obstructive pulmonary disease; TIA: transient ischemic attack. SE: standard error; \* will be explicitly modeled in multivariate models; §: will be included in principal component modeling

|                                          | LA               |      |          | RA               |      |          |
|------------------------------------------|------------------|------|----------|------------------|------|----------|
|                                          | myocyte diameter |      |          | myocyte diameter |      |          |
|                                          | Estimate (μm)    | SE   | p value  | Estimate (μm)    | SE   | p value  |
| Sex*:M                                   | 1.06             | 0.47 | 2.58E-02 | 0.79             | 0.57 | 1.77E-01 |
| Age* (/5years increase)                  | -0.05            | 0.13 | 7.25E-01 | 0.10             | 0.13 | 4.70E-01 |
| Weight <sup>§</sup> (/5kg increase)      | 0.04             | 0.01 | 7.68E-03 | 0.02             | 0.01 | 2.66E-01 |
| Height <sup>§</sup> (/5cm increase)      | 0.03             | 0.02 | 1.56E-01 | 0.02             | 0.02 | 4.49E-01 |
| CHA <sub>2</sub> DS <sub>2</sub> -VASc   | 0.17             | 0.17 | 3.17E-01 | -0.09            | 0.16 | 5.55E-01 |
| Hatch                                    | 0.30             | 0.22 | 1.77E-01 | 0.02             | 0.21 | 9.42E-01 |
| Rhythm*: par.AF                          | 0.35             | 0.56 | 5.27E-01 | 0.41             | 0.56 | 4.67E-01 |
| Rhythm*: pers.AF                         | -0.15            | 0.62 | 8.08E-01 | -0.74            | 0.64 | 2.58E-01 |
| Concomitant PVI                          | -0.03            | 0.51 | 9.49E-01 | -0.07            | 0.75 | 9.30E-01 |
| CABG <sup>§</sup>                        | 0.05             | 0.51 | 9.18E-01 | -0.63            | 0.46 | 1.76E-01 |
| MV surgery <sup>§</sup>                  | -0.11            | 0.48 | 8.29E-01 | 0.24             | 0.54 | 6.51E-01 |
| MV stenosis                              | -1.42            | 1.30 | 2.80E-01 | -0.73            | 1.17 | 5.37E-01 |
| MV insufficiency                         | 0.43             | 0.50 | 3.89E-01 | 0.43             | 0.48 | 3.70E-01 |
| AV surgery <sup>§</sup>                  | 0.18             | 0.51 | 7.29E-01 | 0.29             | 0.48 | 5.50E-01 |
| AV stenosis                              | -0.01            | 0.54 | 9.90E-01 | -0.01            | 0.50 | 9.98E-01 |
| AV insufficiency                         | 0.93             | 0.53 | 8.65E-02 | 0.82             | 0.49 | 9.84E-02 |
| TV insufficiency <sup>§</sup>            | 0.33             | 0.48 | 4.92E-01 | 0.08             | 0.51 | 8.83E-01 |
| Heart failure*                           | -0.30            | 0.73 | 6.83E-01 | 0.59             | 0.63 | 3.55E-01 |
| EF (/5% increase)                        | -0.06            | 0.11 | 6.05E-01 | 0.03             | 0.11 | 7.68E-01 |
| NYHA                                     | 0.32             | 0.23 | 1.82E-01 | 0.07             | 0.24 | 7.69E-01 |
| coronary artery Disease                  | -0.09            | 0.48 | 8.54E-01 | -0.59            | 0.48 | 2.29E-01 |
| prior myocardial infarction <sup>§</sup> | -0.80            | 0.65 | 2.22E-01 | 0.09             | 0.70 | 8.98E-01 |
| periferal artery disease                 | 2.12             | 1.81 | 2.44E-01 | -0.67            | 0.90 | 4.57E-01 |
| Diabetes <sup>§</sup>                    | -0.26            | 0.63 | 6.81E-01 | -0.81            | 0.65 | 2.20E-01 |
| hypertension <sup>§</sup>                | 1.03             | 0.59 | 8.80E-02 | 0.16             | 0.63 | 8.06E-01 |
| COPD                                     | -2.86            | 1.79 | 1.16E-01 | -0.99            | 1.02 | 3.39E-01 |
| hypothyroidism <sup>§</sup>              | -0.32            | 0.63 | 6.10E-01 | -0.31            | 0.90 | 7.31E-01 |
| chronic kidney failure <sup>§</sup>      | -1.67            | 1.81 | 3.62E-01 | 0.35             | 0.90 | 6.99E-01 |
| prior stroke <sup>§</sup>                | 1.11             | 0.61 | 7.42E-02 | -1.08            | 0.89 | 2.28E-01 |
| prior TIA                                | 0.18             | 1.07 | 8.66E-01 | 0.25             | 0.70 | 7.28E-01 |

**Table S12: Univariate associations between clinical parameters and myocyte diameter, stratified by atrial side, excluding HTX patients.** Univariate associations between clinical parameters and myocyte diameter were obtained with univariate regression analysis. LA/RA: Left/Right atrial appendage, par.AF: paroxysmal AF, pers.AF: persistent AF/permanent AF; PVI: pulmonary vein isolation; CABG: coronary artery bypass graft; MV: mitral valve; AV: aortic valve; TV: tricuspid valve; EF: ejection fraction; NYHA: New York Heart Association; HTX: heart transplant surgery; COPD: chronic obstructive pulmonary disease; TIA: transient ischemic attack. SE: standard error; \* will be explicitly modeled in multivariate models; §: will be included in principal component modeling

|                                          | LA                |      |          | RA                |      |          |
|------------------------------------------|-------------------|------|----------|-------------------|------|----------|
|                                          | capillary density |      |          | capillary density |      |          |
|                                          | Estimate          | SE   | p value  | Estimate          | SE   | p value  |
| Sex*:M                                   | -0.02             | 0.05 | 6.37E-01 | 0.05              | 0.04 | 2.45E-01 |
| Age* (/5years increase)                  | 0.01              | 0.01 | 3.78E-01 | 0.01              | 0.01 | 4.37E-01 |
| Weight <sup>§</sup> (/5kg increase)      | 0.01              | 0.02 | 5.41E-01 | <0.01             | 0.01 | 8.67E-01 |
| Height <sup>§</sup> (/5cm increase)      | -0.01             | 0.02 | 7.60E-01 | <0.01             | 0.02 | 9.47E-01 |
| CHA <sub>2</sub> DS <sub>2</sub> -VASc   | 0.03              | 0.02 | 8.61E-02 | -0.01             | 0.01 | 4.48E-01 |
| Hatch                                    | 0.03              | 0.02 | 2.35E-01 | -0.02             | 0.02 | 2.19E-01 |
| Rhythm*: par.AF                          | -0.03             | 0.06 | 6.49E-01 | -0.01             | 0.04 | 8.29E-01 |
| Rhythm*: pers.AF                         | 0.02              | 0.06 | 8.07E-01 | 0.00              | 0.04 | 9.19E-01 |
| Concomitant PVI                          | -0.05             | 0.05 | 3.22E-01 | -0.07             | 0.05 | 1.71E-01 |
| CABG <sup>§</sup>                        | 0.08              | 0.05 | 1.32E-01 | 0.02              | 0.03 | 6.46E-01 |
| MV surgery <sup>§</sup>                  | 0.00              | 0.05 | 9.89E-01 | -0.09             | 0.04 | 1.89E-02 |
| MV stenosis                              | -0.05             | 0.12 | 6.95E-01 | -0.07             | 0.08 | 4.17E-01 |
| MV insufficiency                         | 0.08              | 0.05 | 1.05E-01 | -0.05             | 0.04 | 1.93E-01 |
| AV surgery <sup>§</sup>                  | -0.04             | 0.05 | 3.84E-01 | 0.02              | 0.04 | 9.55E-01 |
| AV stenosis                              | -0.03             | 0.05 | 5.00E-01 | -0.02             | 0.04 | 6.57E-01 |
| AV insufficiency                         | 0.02              | 0.05 | 7.01E-01 | 0.05              | 0.04 | 2.10E-01 |
| TV insufficiency <sup>§</sup>            | 0.05              | 0.05 | 3.43E-01 | -0.05             | 0.04 | 2.23E-01 |
| Heart failure*                           | -0.03             | 0.07 | 6.35E-01 | 0.03              | 0.04 | 5.35E-01 |
| EF (/5% increase)                        | -0.01             | 0.01 | 3.19E-01 | 0.01              | 0.01 | 5.93E-01 |
| NYHA                                     | 0.04              | 0.02 | 1.43E-01 | -0.03             | 0.02 | 1.28E-01 |
| coronary artery Disease                  | 0.04              | 0.05 | 9.33E-01 | -0.03             | 0.04 | 4.98E-01 |
| prior myocardial infarction <sup>§</sup> | 0.05              | 0.06 | 4.68E-01 | -0.04             | 0.05 | 4.91E-01 |
| periferal artery disease                 | -0.09             | 0.17 | 6.00E-01 | 0.06              | 0.06 | 3.40E-01 |
| Diabetes <sup>§</sup>                    | 0.07              | 0.06 | 2.85E-01 | -0.01             | 0.05 | 9.86E-01 |
| hypertension <sup>§</sup>                | 0.08              | 0.06 | 1.91E-01 | -0.03             | 0.04 | 4.42E-01 |
| COPD                                     | NA                | NA   | NA       | -0.04             | 0.07 | 5.48E-01 |
| hypothyroidism <sup>§</sup>              | -0.07             | 0.06 | 2.67E-01 | 0.13              | 0.08 | 9.86E-02 |
| chronic kidney failure <sup>§</sup>      | -0.18             | 0.17 | 3.04E-01 | -0.01             | 0.06 | 8.92E-01 |
| prior stroke <sup>§</sup>                | 0.09              | 0.06 | 1.30E-01 | -0.05             | 0.07 | 4.83E-01 |
| prior TIA                                | -0.04             | 0.10 | 9.68E-01 | -0.02             | 0.05 | 7.23E-01 |

**Table S13: Univariate associations between clinical parameters and capillary density, stratified by atrial side, excluding HTX patients.** Univariate associations between clinical parameters and capillary density were obtained with univariate regression analysis. LA/RA: Left/Right atrial appendage, par.AF: paroxysmal AF, pers.AF: persistent AF/ permanent AF; PVI: pulmonary vein isolation; CABG: coronary artery bypass graft; MV: mitral valve; AV: aortic valve; TV: tricuspid valve; EF: ejection fraction; NYHA: New York Heart Association; HTX: heart transplant surgery; COPD: chronic obstructive pulmonary disease; TIA: transient ischemic attack. SE: standard error; \* will be explicitly modeled in multivariate models; §: will be included in principal component modeling

|                                          | LA                         |      |          | RA                         |      |          |
|------------------------------------------|----------------------------|------|----------|----------------------------|------|----------|
|                                          | capillary size             |      |          | capillary size             |      |          |
|                                          | Estimate ( $\mu\text{m}$ ) | SE   | p value  | Estimate ( $\mu\text{m}$ ) | SE   | p value  |
| Sex*:M                                   | -0.23                      | 0.21 | 2.78E-01 | -0.13                      | 0.16 | 4.20E-01 |
| Age* (/5years increase)                  | -0.08                      | 0.06 | 2.20E-01 | 0.06                       | 0.04 | 1.25E-01 |
| Weight <sup>§</sup> (/5kg increase)      | -0.01                      | 0.01 | 4.10E-01 | -0.03                      | 0.04 | 3.77E-01 |
| Height <sup>§</sup> (/5cm increase)      | -0.02                      | 0.01 | 9.31E-02 | -0.04                      | 0.01 | 5.42E-01 |
| CHA <sub>2</sub> DS <sub>2</sub> -VASc   | <0.01                      | 0.07 | 9.99E-01 | 0.00                       | 0.05 | 9.26E-01 |
| Hatch                                    | -0.03                      | 0.10 | 7.36E-01 | 0.03                       | 0.06 | 6.23E-01 |
| Rhythm*: par.AF                          | -0.31                      | 0.24 | 2.12E-01 | 0.02                       | 0.17 | 9.28E-01 |
| Rhythm*: pers.AF                         | -0.22                      | 0.27 | 4.11E-01 | 0.05                       | 0.17 | 7.86E-01 |
| Concomitant PVI                          | -0.18                      | 0.22 | 4.24E-01 | 0.19                       | 0.20 | 3.63E-01 |
| CABG <sup>§</sup>                        | <0.01                      | 0.22 | 9.98E-01 | -0.07                      | 0.13 | 5.79E-01 |
| MV surgery <sup>§</sup>                  | -0.07                      | 0.21 | 7.55E-01 | 0.32                       | 0.15 | 3.74E-02 |
| MV stenosis                              | 1.10                       | 0.51 | 3.73E-02 | -0.07                      | 0.36 | 8.35E-01 |
| MV insufficiency                         | -0.07                      | 0.21 | 7.40E-01 | 0.18                       | 0.15 | 2.25E-01 |
| AV surgery <sup>§</sup>                  | 0.03                       | 0.22 | 8.95E-01 | 0.03                       | 0.14 | 9.83E-01 |
| AV stenosis                              | 0.23                       | 0.22 | 3.07E-01 | -0.06                      | 0.17 | 7.25E-01 |
| AV insufficiency                         | -0.26                      | 0.23 | 2.79E-01 | -0.01                      | 0.16 | 9.95E-01 |
| TV insufficiency <sup>§</sup>            | -0.13                      | 0.21 | 5.49E-01 | 0.35                       | 0.14 | 1.88E-02 |
| Heart failure*                           | 0.50                       | 0.30 | 9.82E-02 | 0.17                       | 0.18 | 3.51E-01 |
| EF (/5% increase)                        | -0.03                      | 0.05 | 4.89E-01 | -0.01                      | 0.04 | 8.89E-01 |
| NYHA                                     | -0.04                      | 0.11 | 7.13E-01 | 0.10                       | 0.07 | 1.30E-01 |
| coronary artery Disease                  | 0.05                       | 0.21 | 8.25E-01 | -0.09                      | 0.14 | 5.45E-01 |
| prior myocardial infarction <sup>§</sup> | 0.08                       | 0.28 | 7.81E-01 | 0.13                       | 0.22 | 5.50E-01 |
| periferal artery disease                 | -0.69                      | 0.76 | 3.68E-01 | -0.20                      | 0.24 | 4.18E-01 |
| Diabetes <sup>§</sup>                    | 0.33                       | 0.27 | 2.38E-01 | -0.37                      | 0.18 | 4.69E-02 |
| hypertension <sup>§</sup>                | 0.07                       | 0.26 | 7.87E-01 | -0.09                      | 0.17 | 6.21E-01 |
| COPD                                     | -0.57                      | 0.76 | 4.60E-01 | -0.27                      | 0.28 | 3.31E-01 |
| hypothyroidism <sup>§</sup>              | 0.59                       | 0.28 | 3.84E-02 | 0.18                       | 0.25 | 4.75E-01 |
| chronic kidney failure <sup>§</sup>      | 1.79                       | 0.72 | 1.64E-02 | -0.05                      | 0.24 | 8.53E-01 |
| prior stroke <sup>§</sup>                | -0.13                      | 0.26 | 6.20E-01 | 0.06                       | 0.28 | 8.21E-01 |
| prior TIA                                | 0.53                       | 0.44 | 2.41E-01 | -0.13                      | 0.20 | 5.24E-01 |

**Table S14: Univariate associations between clinical parameters and capillary diameter, stratified by atrial side, excluding HTX patients.** Univariate associations between clinical parameters and capillary diameter were obtained with univariate regression analysis. LA/RA: Left/Right atrial appendage, par.AF: paroxysmal AF, pers.AF: persistent AF/ permanent AF; PVI: pulmonary vein isolation; CABG: coronary artery bypass graft; MV: mitral valve; AV: aortic valve; TV: tricuspid valve; EF: ejection fraction; NYHA: New York Heart Association; HTX: heart transplant surgery; COPD: chronic obstructive pulmonary disease; TIA: transient ischemic attack. SE: standard error; \* will be explicitly modeled in multivariate models; §: will be included in principal component modeling

| LA                   |             |      |       |       |                           |      |      |      |                    |      |      |      |                           |      |      |      |
|----------------------|-------------|------|-------|-------|---------------------------|------|------|------|--------------------|------|------|------|---------------------------|------|------|------|
|                      | Total ECM   |      |       |       | endomysial fibrosis       |      |      |      | Fibroblast density |      |      |      | Myocyte diameter          |      |      |      |
|                      | $\beta$ (%) | SE   | p     | padj  | $\beta$ ( $\mu\text{m}$ ) | SE   | p    | padj | $\beta$            | SE   | p    | padj | $\beta$ ( $\mu\text{m}$ ) | SE   | p    | padj |
| <i>intercept</i>     | 24.96       | 3.12 |       |       | 4.97                      | 1.23 |      |      | 0.38               | 0.22 |      |      | 14.07                     | 2.12 |      |      |
| <i>age</i>           | 0.58        | 0.24 | 0.02  | 0.05  | 0.13                      | 0.06 | 0.05 | 0.04 | 0.001              | 0.02 | 0.96 | 0.95 | -0.10                     | 0.17 | 0.54 |      |
| <i>Sex: F</i>        | 4.27        | 1.27 | 0.001 | 0.001 | 0.82                      | 0.40 | 0.03 | 0.02 | 0.02               | 0.08 | 0.77 | 0.71 | -1.46                     | 0.56 | 0.04 | 0.04 |
| <i>Heart Failure</i> | 4.24        | 1.35 | 0.002 | 0.001 | 1.18                      | 0.50 | 0.02 | 0.03 | 0.04               | 0.07 | 0.55 | 0.51 | -0.50                     | 0.86 | 0.56 | 0.61 |
| <i>par.AF</i>        | -1.72       | 1.07 | 0.11  | 0.10  | 0.36                      | 0.41 | 0.38 | 0.35 | 0.07               | 0.07 | 0.29 | 0.26 | 0.85                      | 0.72 | 0.24 | 0.20 |
| <i>pers.AF</i>       | -0.12       | 1.20 | 0.92  | 0.74  | 0.96                      | 0.44 | 0.04 | 0.04 | 0.11               | 0.07 | 0.10 | 0.16 | 0.75                      | 0.77 | 0.34 | 0.35 |
| <i>PC1</i>           | 0.32        | 0.34 | 0.35  | 0.39  | 0.02                      | 0.13 | 0.85 | 0.88 | 0.02               | 0.02 | 0.45 | 0.39 | -0.02                     | 0.23 | 0.94 | 1.00 |
| <i>PC2</i>           | 0.90        | 0.52 | 0.09  | 0.19  | 0.31                      | 0.20 | 0.08 | 0.19 | -0.01              | 0.02 | 0.68 | 0.76 | -0.25                     | 0.24 | 0.31 | 0.36 |
| <i>PC3</i>           | 0.19        | 0.43 | 0.67  | 0.65  | -0.28                     | 0.16 | 0.08 | 0.15 | -0.01              | 0.02 | 0.58 | 0.65 | -0.19                     | 0.28 | 0.50 | 0.49 |
| <i>PC4</i>           | 0.19        | 0.41 | 0.65  | 0.73  | 0.12                      | 0.16 | 0.45 | 0.49 | -0.01              | 0.02 | 0.75 | 0.78 | -0.02                     | 0.27 | 0.93 | 0.95 |

| RA                   |             |      |      |      |                           |      |      |      |                    |       |      |      |                           |      |      |      |
|----------------------|-------------|------|------|------|---------------------------|------|------|------|--------------------|-------|------|------|---------------------------|------|------|------|
|                      | Total ECM   |      |      |      | endomysial fibrosis       |      |      |      | Fibroblast density |       |      |      | Myocyte diameter          |      |      |      |
|                      | $\beta$ (%) | SE   | p    | padj | $\beta$ ( $\mu\text{m}$ ) | SE   | p    | padj | $\beta$            | SE    | p    | padj | $\beta$ ( $\mu\text{m}$ ) | SE   | p    | padj |
| <i>intercept</i>     | 35.66       | 6.67 |      |      | 6.55                      | 1.94 |      |      | -0.01              | 0.21  | 0.98 |      | 9.10                      | 2.46 |      |      |
| <i>age</i>           | -0.02       | 0.50 | 0.97 | 0.96 | 0.18                      | 0.11 | 0.04 | 0.03 | 0.03               | 0.003 | 0.10 | 0.12 | 0.28                      | 0.18 | 0.13 | 0.16 |
| <i>Sex: F</i>        | -2.14       | 2.27 | 0.35 | 0.40 | 0.12                      | 0.50 | 0.80 | 0.78 | 0.03               | 0.06  | 0.59 | 0.52 | 0.58                      | 0.80 | 0.48 | 0.41 |
| <i>Heart Failure</i> | 1.54        | 2.03 | 0.45 | 0.47 | 0.23                      | 0.36 | 0.53 | 0.49 | 0.05               | 0.07  | 0.45 | 0.41 | -0.04                     | 0.71 | 0.96 | 0.93 |
| <i>par.AF</i>        | 0.17        | 1.93 | 0.93 | 0.85 | 0.92                      | 0.40 | 0.02 | 0.03 | 0.05               | 0.06  | 0.45 | 0.47 | 1.03                      | 0.69 | 0.14 | 0.17 |
| <i>pers.AF</i>       | 3.17        | 2.12 | 0.14 | 0.08 | 0.97                      | 0.41 | 0.02 | 0.01 | 0.03               | 0.06  | 0.59 | 0.61 | -0.56                     | 0.75 | 0.46 | 0.41 |
| <i>PC1</i>           | 0.07        | 0.57 | 0.90 | 0.85 | 0.07                      | 0.17 | 0.70 | 0.77 | 0.01               | 0.02  | 0.51 | 0.53 | 0.04                      | 0.21 | 0.87 | 0.83 |
| <i>PC2</i>           | 0.95        | 0.55 | 0.09 | 0.11 | 0.19                      | 0.15 | 0.21 | 0.26 | -0.03              | 0.02  | 0.14 | 0.17 | -0.28                     | 0.19 | 0.15 | 0.20 |
| <i>PC3</i>           | -0.52       | 0.62 | 0.41 | 0.39 | -0.03                     | 0.17 | 0.86 | 0.85 | -0.003             | 0.02  | 0.88 | 0.86 | 0.07                      | 0.22 | 0.75 | 0.82 |
| <i>PC4</i>           | -0.57       | 0.61 | 0.36 | 0.29 | -0.11                     | 0.17 | 0.53 | 0.52 | -0.01              | 0.02  | 0.56 | 0.53 | 0.08                      | 0.22 | 0.72 | 0.73 |

**Table S15: Multivariate models describing the association between clinical traits and structural properties of the myocardium in left (LA) and right (RA) atrial appendages, excluding HTX patients.** Age, sex, heart failure and rhythm history were modeled explicitly. A combination of 13 additional clinical traits was combined in 4 principal components (PCs). B: Degree of change in the outcome variable for every unit of change in the predictor variable. SE: standard error, ECM: extracellular matrix, parAF: paroxysmal atrial fibrillation, persAF: persistent atrial fibrillation, PC: principal component



*LA*

|                      | capillary density |      |      |                  | capillary size     |      |      |                  |
|----------------------|-------------------|------|------|------------------|--------------------|------|------|------------------|
|                      | $\beta$ (n)       | SE   | p    | p <sub>adj</sub> | $\beta$ ( $\mu$ m) | SE   | p    | p <sub>adj</sub> |
| <i>intercept</i>     | 0.35              | 0.21 |      |                  | 6.02               | 0.90 |      |                  |
| <i>age</i>           | 0.017             | 0.02 | 0.30 | 0.36             | -0.04              | 0.07 | 0.59 | 0.57             |
| <i>sex:F</i>         | -0.13             | 0.08 | 0.12 | 0.16             | -0.25              | 0.34 | 0.47 | 0.47             |
| <i>heart failure</i> | -0.02             | 0.07 | 0.78 | 0.73             | 0.52               | 0.31 | 0.10 | 0.16             |
| <i>parAF</i>         | -0.05             | 0.07 | 0.43 | 0.55             | -0.29              | 0.29 | 0.32 | 0.32             |
| <i>persAF</i>        | 0.02              | 0.07 | 0.77 | 0.74             | -0.23              | 0.30 | 0.44 | 0.40             |
| <i>PC1</i>           | 0.05              | 0.02 | 0.07 | 0.10             | 0.02               | 0.09 | 0.87 | 0.83             |
| <i>PC2</i>           | <0.001            | 0.02 | 1.00 | 0.99             | 0.05               | 0.09 | 0.60 | 0.68             |
| <i>PC3</i>           | -0.002            | 0.02 | 0.94 | 0.95             | -0.06              | 0.10 | 0.55 | 0.50             |
| <i>PC4</i>           | -0.01             | 0.02 | 0.73 | 0.77             | 0.02               | 0.10 | 0.87 | 0.91             |

*RA*

|                      | capillary density |      |      |                  | capillary size     |      |      |                  |
|----------------------|-------------------|------|------|------------------|--------------------|------|------|------------------|
|                      | $\beta$ (n)       | SE   | p    | p <sub>adj</sub> | $\beta$ ( $\mu$ m) | SE   | p    | p <sub>adj</sub> |
| <i>intercept</i>     | 0.18              | 0.18 |      |                  | 4.94               | 0.68 |      |                  |
| <i>age</i>           | 0.01              | 0.00 | 0.30 | 0.37             | 0.05               | 0.05 | 0.35 | 0.41             |
| <i>sex:F</i>         | 0.05              | 0.06 | 0.35 | 0.32             | -0.10              | 0.21 | 0.64 | 0.69             |
| <i>heart failure</i> | 0.02              | 0.05 | 0.68 | 0.63             | 0.10               | 0.19 | 0.60 | 0.50             |
| <i>parAF</i>         | -0.03             | 0.05 | 0.58 | 0.51             | -0.05              | 0.20 | 0.82 | 0.75             |
| <i>persAF</i>        | 0.01              | 0.05 | 0.88 | 0.86             | -0.06              | 0.19 | 0.76 | 0.78             |
| <i>PC1</i>           | 0.004             | 0.02 | 0.81 | 0.76             | -0.03              | 0.06 | 0.64 | 0.63             |
| <i>PC2</i>           | -0.003            | 0.02 | 0.88 | 0.84             | 0.01               | 0.06 | 0.89 | 0.86             |
| <i>PC3</i>           | 0.005             | 0.02 | 0.76 | 0.72             | 0.07               | 0.06 | 0.23 | 0.27             |
| <i>PC4</i>           | 0.002             | 0.01 | 0.88 | 0.80             | -0.02              | 0.06 | 0.73 | 0.68             |

**Table S16 (continuation S15): Multivariate models describing the association between clinical traits and structural properties of the myocardium in left (LA) and right (RA) atrial appendages, excluding HTX patients.** Age, sex, heart failure and rhythm history were modeled explicitly. A combination of 13 additional clinical traits was combined in 4 principal components (PCs). B: Degree of change in the outcome variable for every unit of change in the predictor variable. SE: standard error, ECM: extracellular matrix, parAF: paroxysmal atrial fibrillation, persAF: persistent atrial fibrillation, PC: principal component

|                     | LA                      |                             |        |        | RA                      |                             |        |        |
|---------------------|-------------------------|-----------------------------|--------|--------|-------------------------|-----------------------------|--------|--------|
|                     | Fibrotic<br>atCM (n=22) | hypertrophic<br>atCM (n=69) | p      | padj   | fibrotic<br>atCM (n=45) | hypertrophic<br>atCM (n=29) | p      | padj   |
| capillary density   | 0.584±0.184             | 0.451±0.176                 | <0.001 | <0.001 | 0.449±0.175             | 0.468±0.175                 | 0.011  | 0.013  |
| capillary size      | 5.545±1.166             | 5.493±1.062                 | 0.821  | 0.857  | 5.498±1.059             | 5.506±1.093                 | 0.524  | 0.648  |
| endomysial fibrosis | 7.955±1.851             | 4.784±1.791                 | <0.001 | <0.001 | 8.234±1.835             | 5.462±1.786                 | <0.001 | <0.001 |
| total ECM           | 32.451±5.252            | 28.924±5.253                | <0.001 | <0.001 | 34.662±5.321            | 28.264±5.448                | <0.001 | <0.001 |
| Vimentin signal     | 10.613±4.830            | 6.236±3.872                 | <0.001 | <0.001 | 10.868±4.053            | 8.709±5.084                 | 0.788  | 0.776  |
| Myocyte Diameter    | 10.948±1.872            | 12.106±1.904                | 0.009  | 0.01   | 10.944±1.632            | 13.524±2.098                | <0.001 | <0.001 |

**Table S17: Univariate structural differences between left and right atrial appendage samples clustered in unique clusters.** NoAF: No history of AF, pAF: paroxysmal AF, persAF: persistent/permanent AF; AV/MV aortic/mitral valve; PVI: concomitant pulmonary vein isolation; HTX: Heart Transplant Xenograft; CAD: Coronary artery disease; CABG: Coronary artery bypass graft; CKD: chronic kidney disease TIA: Transient ischemic attack; atCM: atrial cardiomyopathy. \*Variables that were explicitly modeled in multivariate logistic regression model (table 4). Values are presented as (mean ± SD) for continuous traits, or in absolute number and as percentage for dichotomous traits.

|                           | LA                   |                          |       |       | RA                      |                             |       |        |
|---------------------------|----------------------|--------------------------|-------|-------|-------------------------|-----------------------------|-------|--------|
|                           | Fibrotic atCM (n=22) | hypertrophic atCM (n=69) | p     | padj  | fibrotic CM atCM (n=45) | hypertrophic CM atCM (n=29) | p     | padj   |
| Age*                      | 63.0±9.40            | 62.9±11.4                | 0.971 | 0.998 | 64.8±11.8               | 64.1±12.2                   | 0.806 | 0.823  |
| weight                    | 75.4±17.3            | 78.1±14.5                | 0.469 | 0.315 | 77.6±17.1               | 83.9±15.1                   | 0.111 | 0.118  |
| height                    | 169.6±10.9           | 173.4±9.18               | 0.109 | 0.107 | 171.4±11.5              | 175.9±7.2                   | 0.064 | 0.053  |
| bmi                       | 25.9±4.1             | 26.2±4.1                 | 0.766 | 0.996 | 26.4±4.7                | 26.9±3.8                    | 0.633 | 0.613  |
| Sex (F)*                  | 9 (41%)              | 17 (25%)                 | 0.141 | 0.138 | 14 (31%)                | 0 (0%)                      | 0.002 | <0.001 |
| <u>Rhythm</u> *           |                      |                          | 0.041 | 0.015 |                         |                             | 0.683 | 0.515  |
| • noAF                    | 9 (41%)              | 31 (45%)                 |       |       | 23 (51%)                | 18 (62%)                    |       |        |
| • pAF                     | 4 (18%)              | 21 (30%)                 |       |       | 11 (24%)                | 7 (24%)                     |       |        |
| • persAF                  | 9 (41%)              | 17 (25%)                 |       |       | 11 (24%)                | 4 (14%)                     |       |        |
| <u>HF</u> *               | 14 (64%)             | 23 (33%)                 | 0.008 | 0.008 | 13 (29%)                | 13 (45%)                    | 0.161 | 0.165  |
| <u>HF category</u>        |                      |                          | 0.011 | 0.024 |                         |                             | 0.341 | 0.355  |
| • noHF                    | 8 (36%)              | 46 (67%)                 |       |       | 32 (71%)                | 16 (59%)                    |       |        |
| • HFpEF                   | 2 (9%)               | 5 (7%)                   |       |       | 1 (3%)                  | 2 (7%)                      |       |        |
| • HFrfEF                  | 12 (55%)             | 18 (26%)                 |       |       | 12 (27%)                | 11 (41%)                    |       |        |
| <u>EF category</u>        |                      |                          | 0.034 | 0.046 |                         |                             | 0.321 | 0.342  |
| • mildly reduced          | 1 (5%)               | 3 (4%)                   |       |       | 5 (11%)                 | 4 (15%)                     |       |        |
| • moderately reduced      | 5 (23%)              | 8 (12%)                  |       |       | 2 (4%)                  | 5 (19%)                     |       |        |
| • severely reduced        | 6 (27%)              | 7 (10%)                  |       |       | 5 (11%)                 | 2 (7%)                      |       |        |
| <u>primary indication</u> |                      |                          | 0.041 | 0.034 |                         |                             | 0.364 | 0.376  |
| • CABG only               | 3 (14%)              | 12 (17%)                 |       |       | 16 (36%)                | 6 (21%)                     |       |        |
| • MVS                     | 6 (27%)              | 17(25%)                  |       |       | 9 (20%)                 | 5 (17%)                     |       |        |
| • AVS                     | 1 (5%)               | 17 (25%)                 |       |       | 8 (18%)                 | 8 (28%)                     |       |        |
| • HTX                     | 12 (55%)             | 19 (28%)                 |       |       | 9 (20%)                 | 8 (28%)                     |       |        |
| • PVI                     | 0 (0%)               | 2 (3%)                   |       |       | 0 (0%)                  | 1 (3%)                      |       |        |
| • donor                   | 0 (0%)               | 2 (3%)                   |       |       | 0 (0%)                  | 1 (3%)                      |       |        |
| CAD                       | 8 (36%)              | 32 (47%)                 | 0.081 | 0.334 | 27 (60%)                | 18 (62%)                    | 0.751 | 0.795  |
| prior MI                  | 3 (14%)              | 19 (28%)                 | 0.063 | 0.209 | 7 (16%)                 | 7 (24%)                     | 0.572 | 0.546  |
| PAD                       | 2 (9%)               | 1 (1%)                   | 0.072 | 0.069 | 6 (13%)                 | 1 (4%)                      | 0.221 | 0.218  |
| diabetes                  | 5 (23%)              | 13 (19%)                 | 0.994 | 0.944 | 8 (17%)                 | 2 (7%)                      | 0.239 | 0.214  |
| hypertension              | 14 (64%)             | 48 (69%)                 | 0.839 | 0.795 | 32 (71%)                | 21 (72%)                    | 0.858 | 0.863  |

|                     |         |          |       |       |         |         |       |       |
|---------------------|---------|----------|-------|-------|---------|---------|-------|-------|
| <i>COPD</i>         | 2 (9%)  | 3 (4%)   | 0.373 | 0.394 | 3 (6%)  | 0 (0%)  | 0.181 | 0.179 |
| <i>thyroid dysf</i> | 2 (9%)  | 13 (19%) | 0.719 | 0.744 | 8 (17%) | 1 (4%)  | 0.091 | 0.067 |
| <i>CKD</i>          | 4 (18%) | 2 (3%)   | 0.010 | 0.014 | 4 (9%)  | 1 (4%)  | 0.432 | 0.369 |
| <i>stroke</i>       | 1 (5%)  | 9 (13%)  | 0.275 | 0.316 | 3 (6%)  | 0 (0%)  | 0.189 | 0.191 |
| <i>TIA</i>          | 0 (0%)  | 3 (4%)   | 0.324 | 0.324 | 5 (11%) | 3 (11%) | 0.905 | 0.923 |

**Table S18: Univariate clinical differences between left and right atrial appendage samples clustered in unique clusters.** NoAF: No history of AF, pAF: paroxysmal AF, persAF: persistent/permanent AF; AV/MV aortic/mitral valve; PVI: concomitant pulmonary vein isolation; HTX: Heart Transplant Xenograft; CAD: Coronary artery disease; CABG: Coronary artery bypass graft; CKD: chronic kidney disease TIA: Transient ischemic attack; CM: cardiomyopathy; MI: myocardial infarction. \*Variables that were explicitly modeled in multivariate logistic regression model (table 4). Values are presented as (mean  $\pm$  SD) for continuous traits, or in absolute number and as percentage for dichotomous

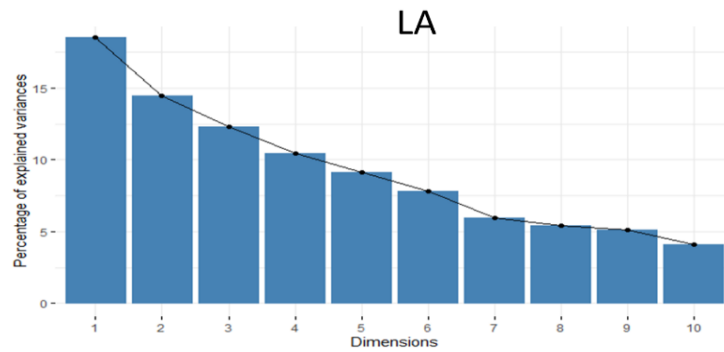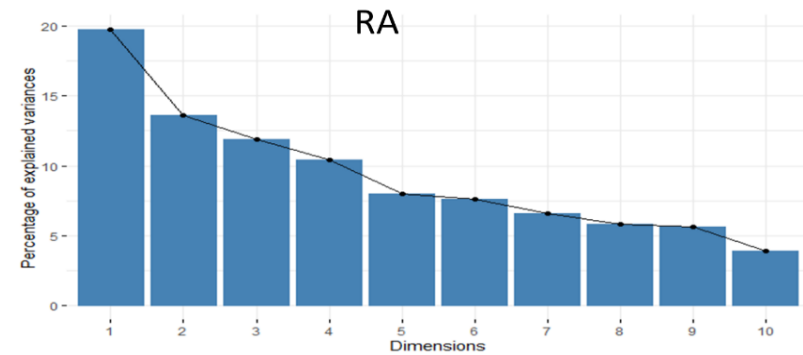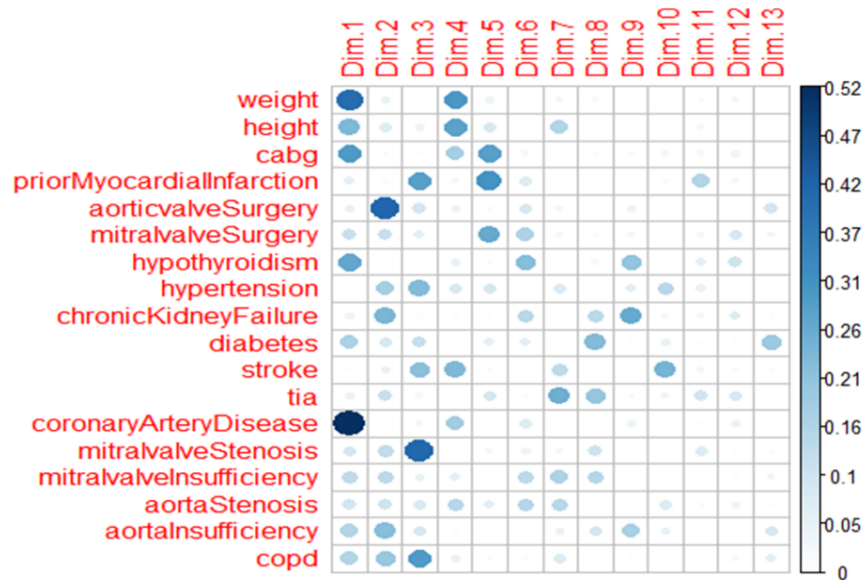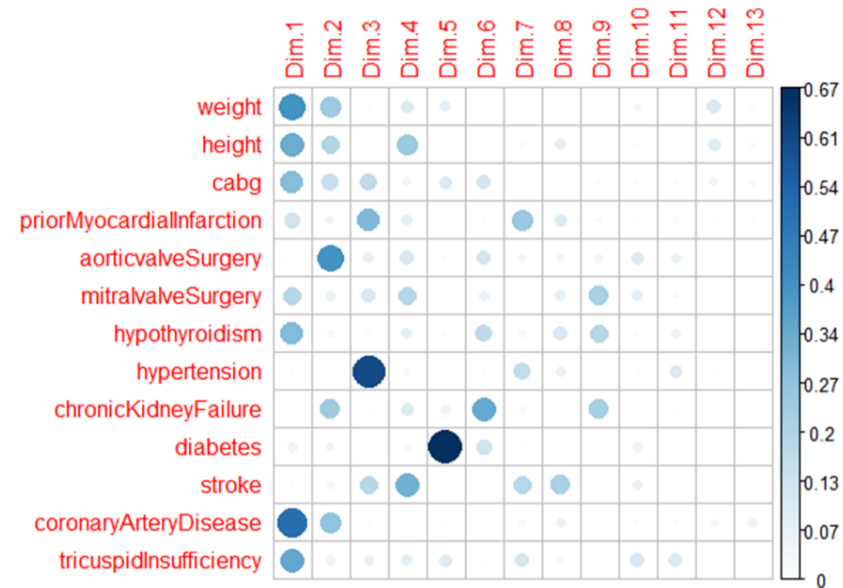

**Figure S1: Principal component analyses for reduction of dimensionality.** Orthogonal principal component analysis was performed in order to model the cumulative variance of 13 clinical traits into principal components. Variants were scaled. Based on the scree plots for LA and RA (top), 4 Principal components were selected, covering a cumulative variance of respectively 56 and 57%. Representation of each variable in each principal component was shown in the corrplots (bottom). cabg: coronary artery bypass graft, tia: transient ischemic attack, copd: chronic obstructive pulmonary disease, LA/RA: left/right atrium

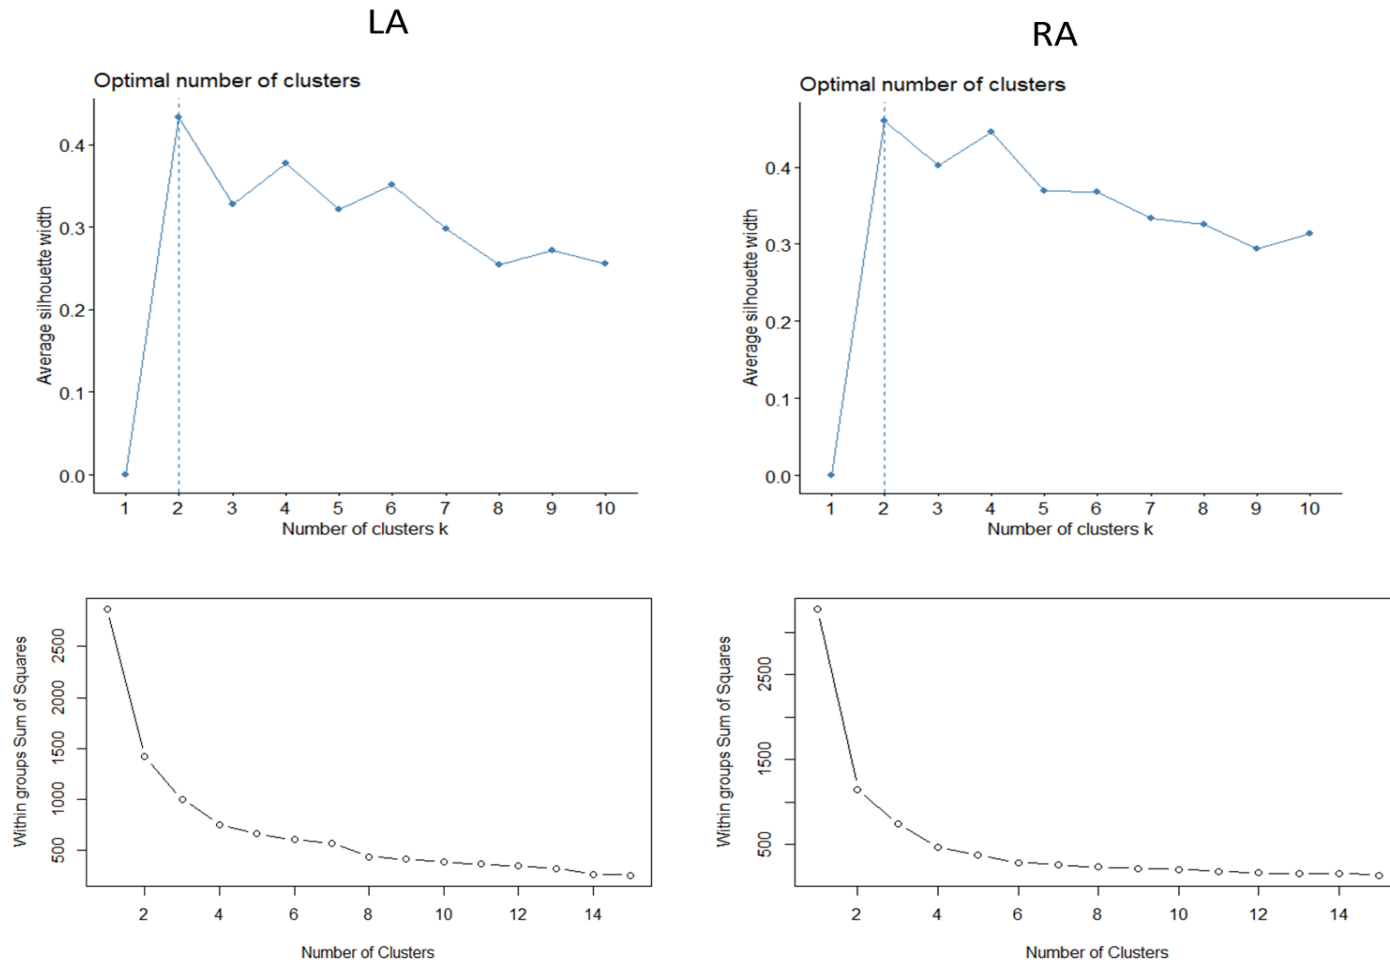

**Figure S2: Optimal cluster size in Fuzzy k-means clustering.** Left and Right atrial appendage samples (LA, RA) where clustered based on structural features (endomysial fibrosis, total extracellular matrix content, fibroblast signal, capillary density and size, cardiomyocyte size). Optimal cluster size was automatically determined at 2 clusters per side, resulting in an optimal silhouette score (top). Within-group sum of squares was sufficiently low with 2 clusters, representing sufficiently low variability of the observations within each cluster (bottom).
